# Supplementary material
Source: publisher site journal article supplement (https://www.dovepress.com/article/384607)
Supplement: Supplementary file 1 [file get_supplementary_file.php]

Supplementary Material

# Supplementary Figures and Tables

## Supplementary Figures

**
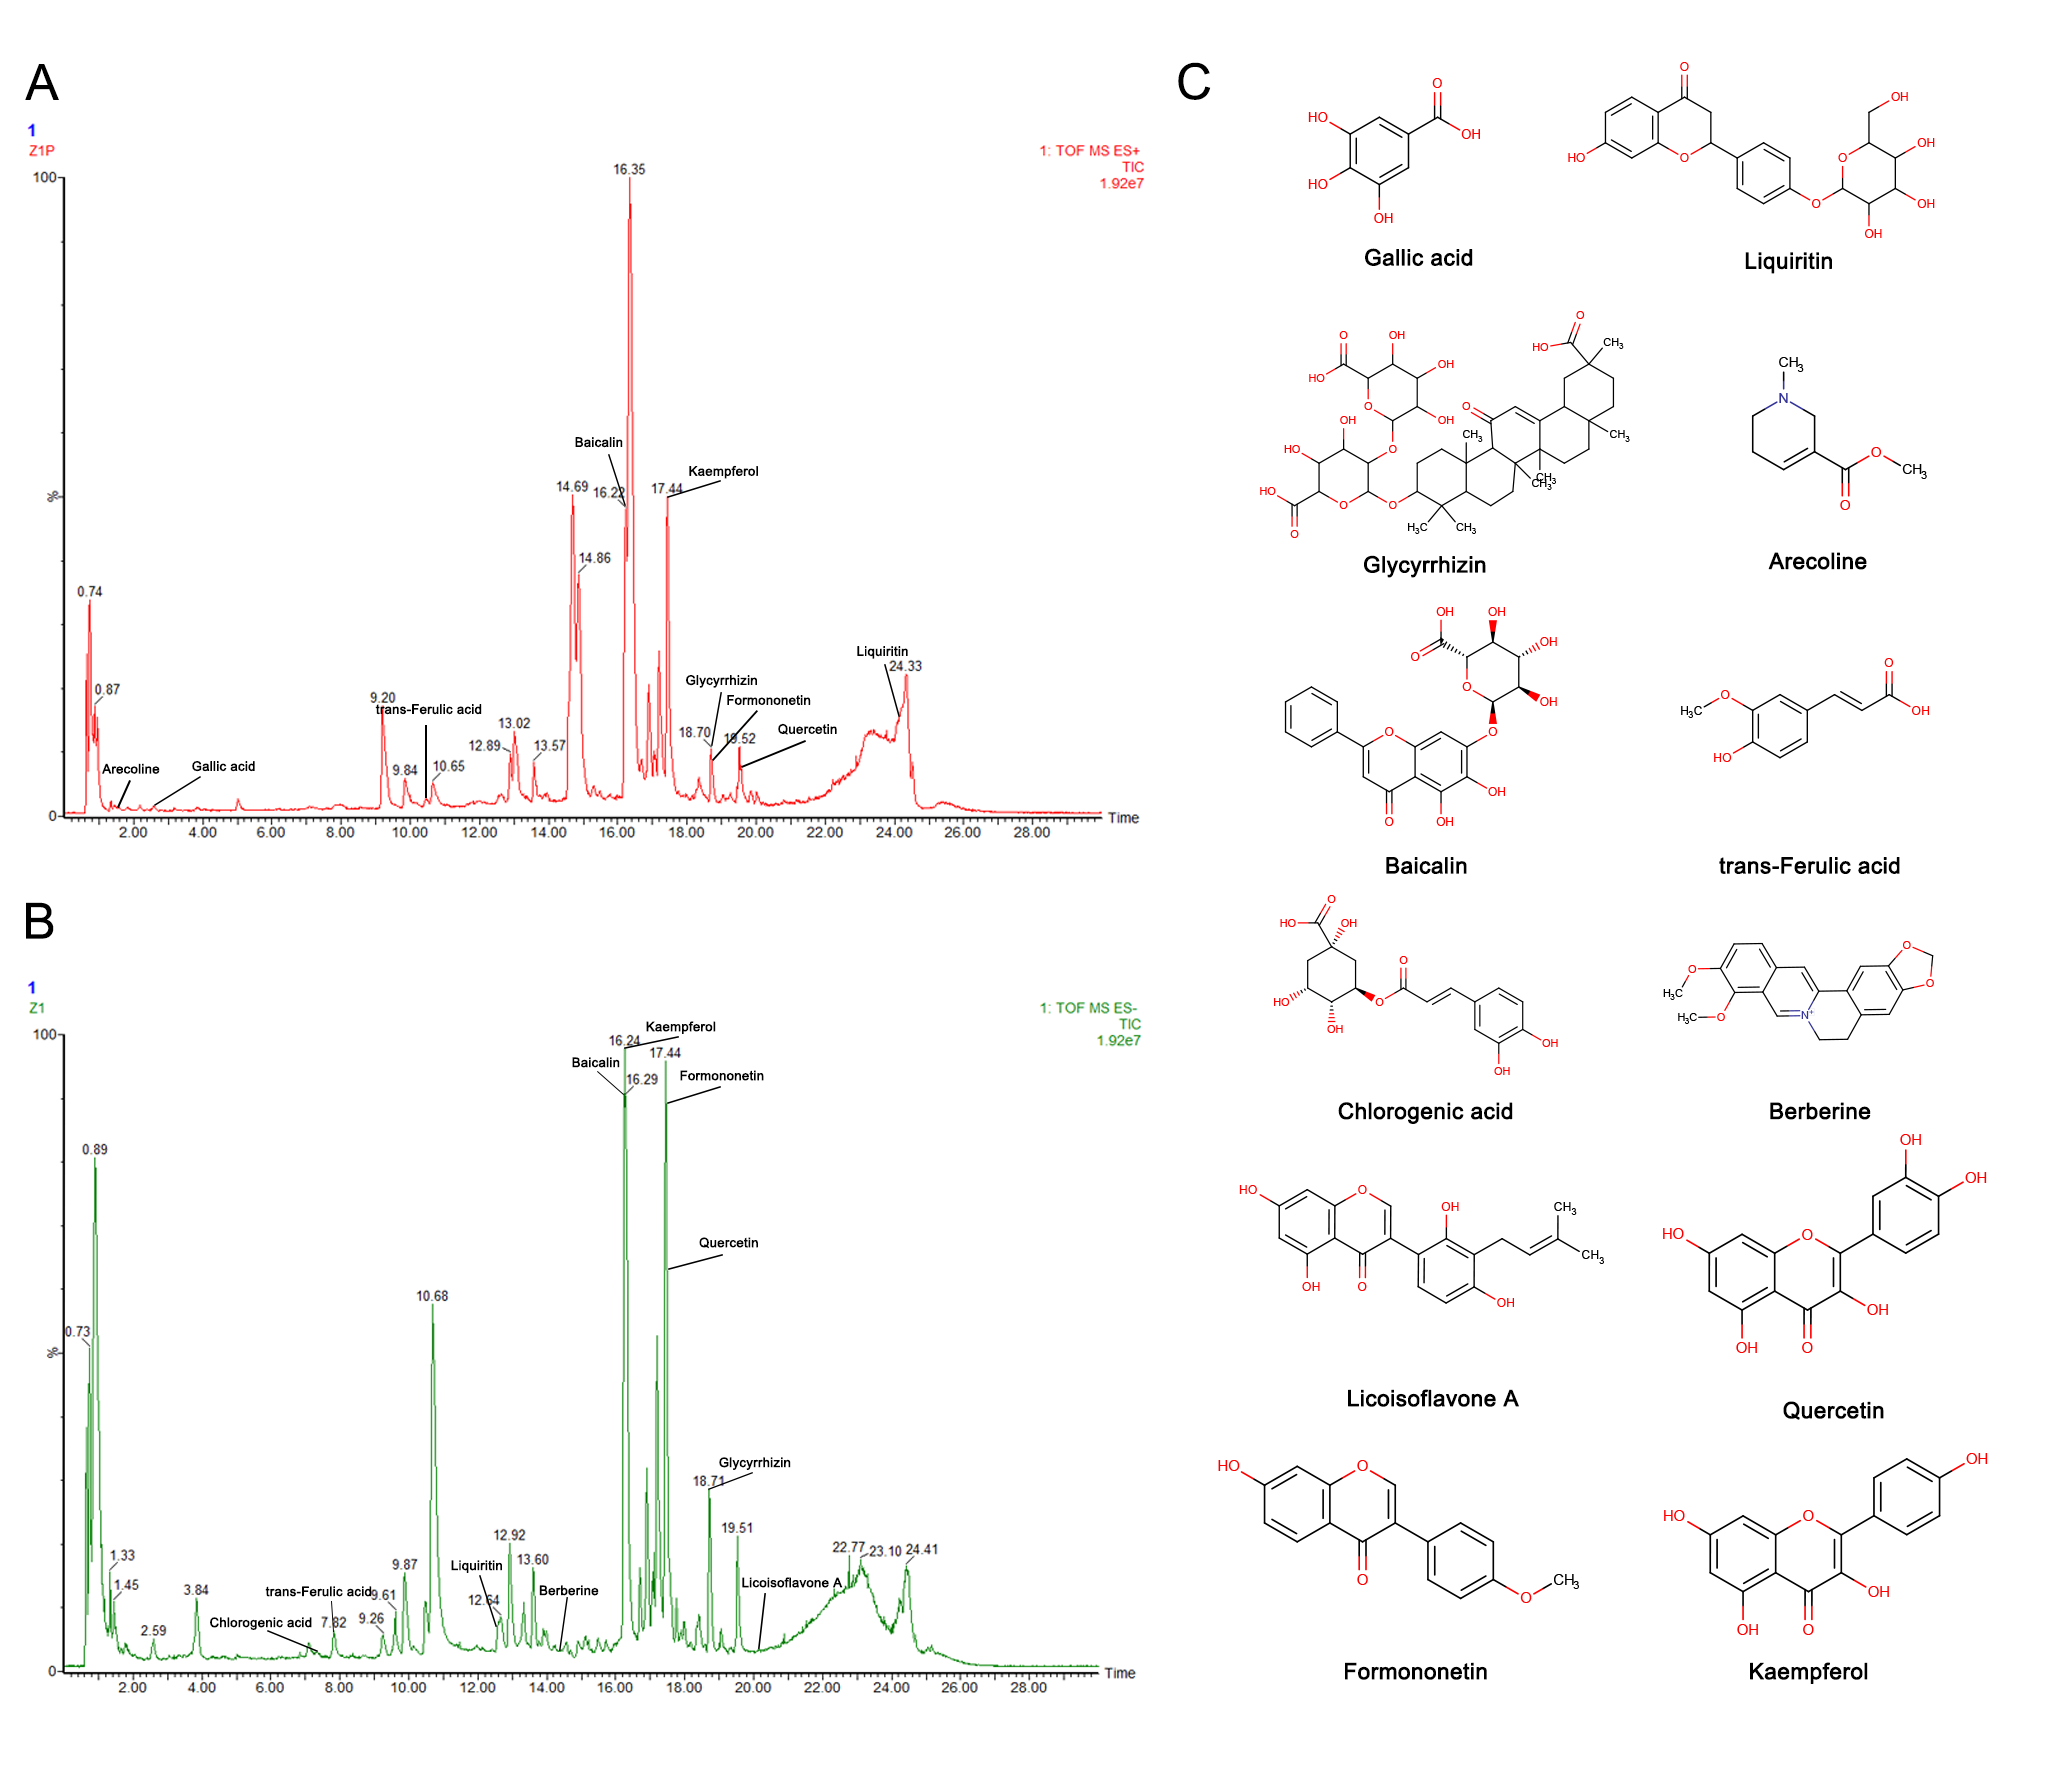
**

**Figure S1** Identification of chemical components of SYD. (A) Total ion chromatogram (TIC) in positive ion mode for SYD; (B) TIC in negative ion mode for SYD; (C) Molecular structure of constituents.

**
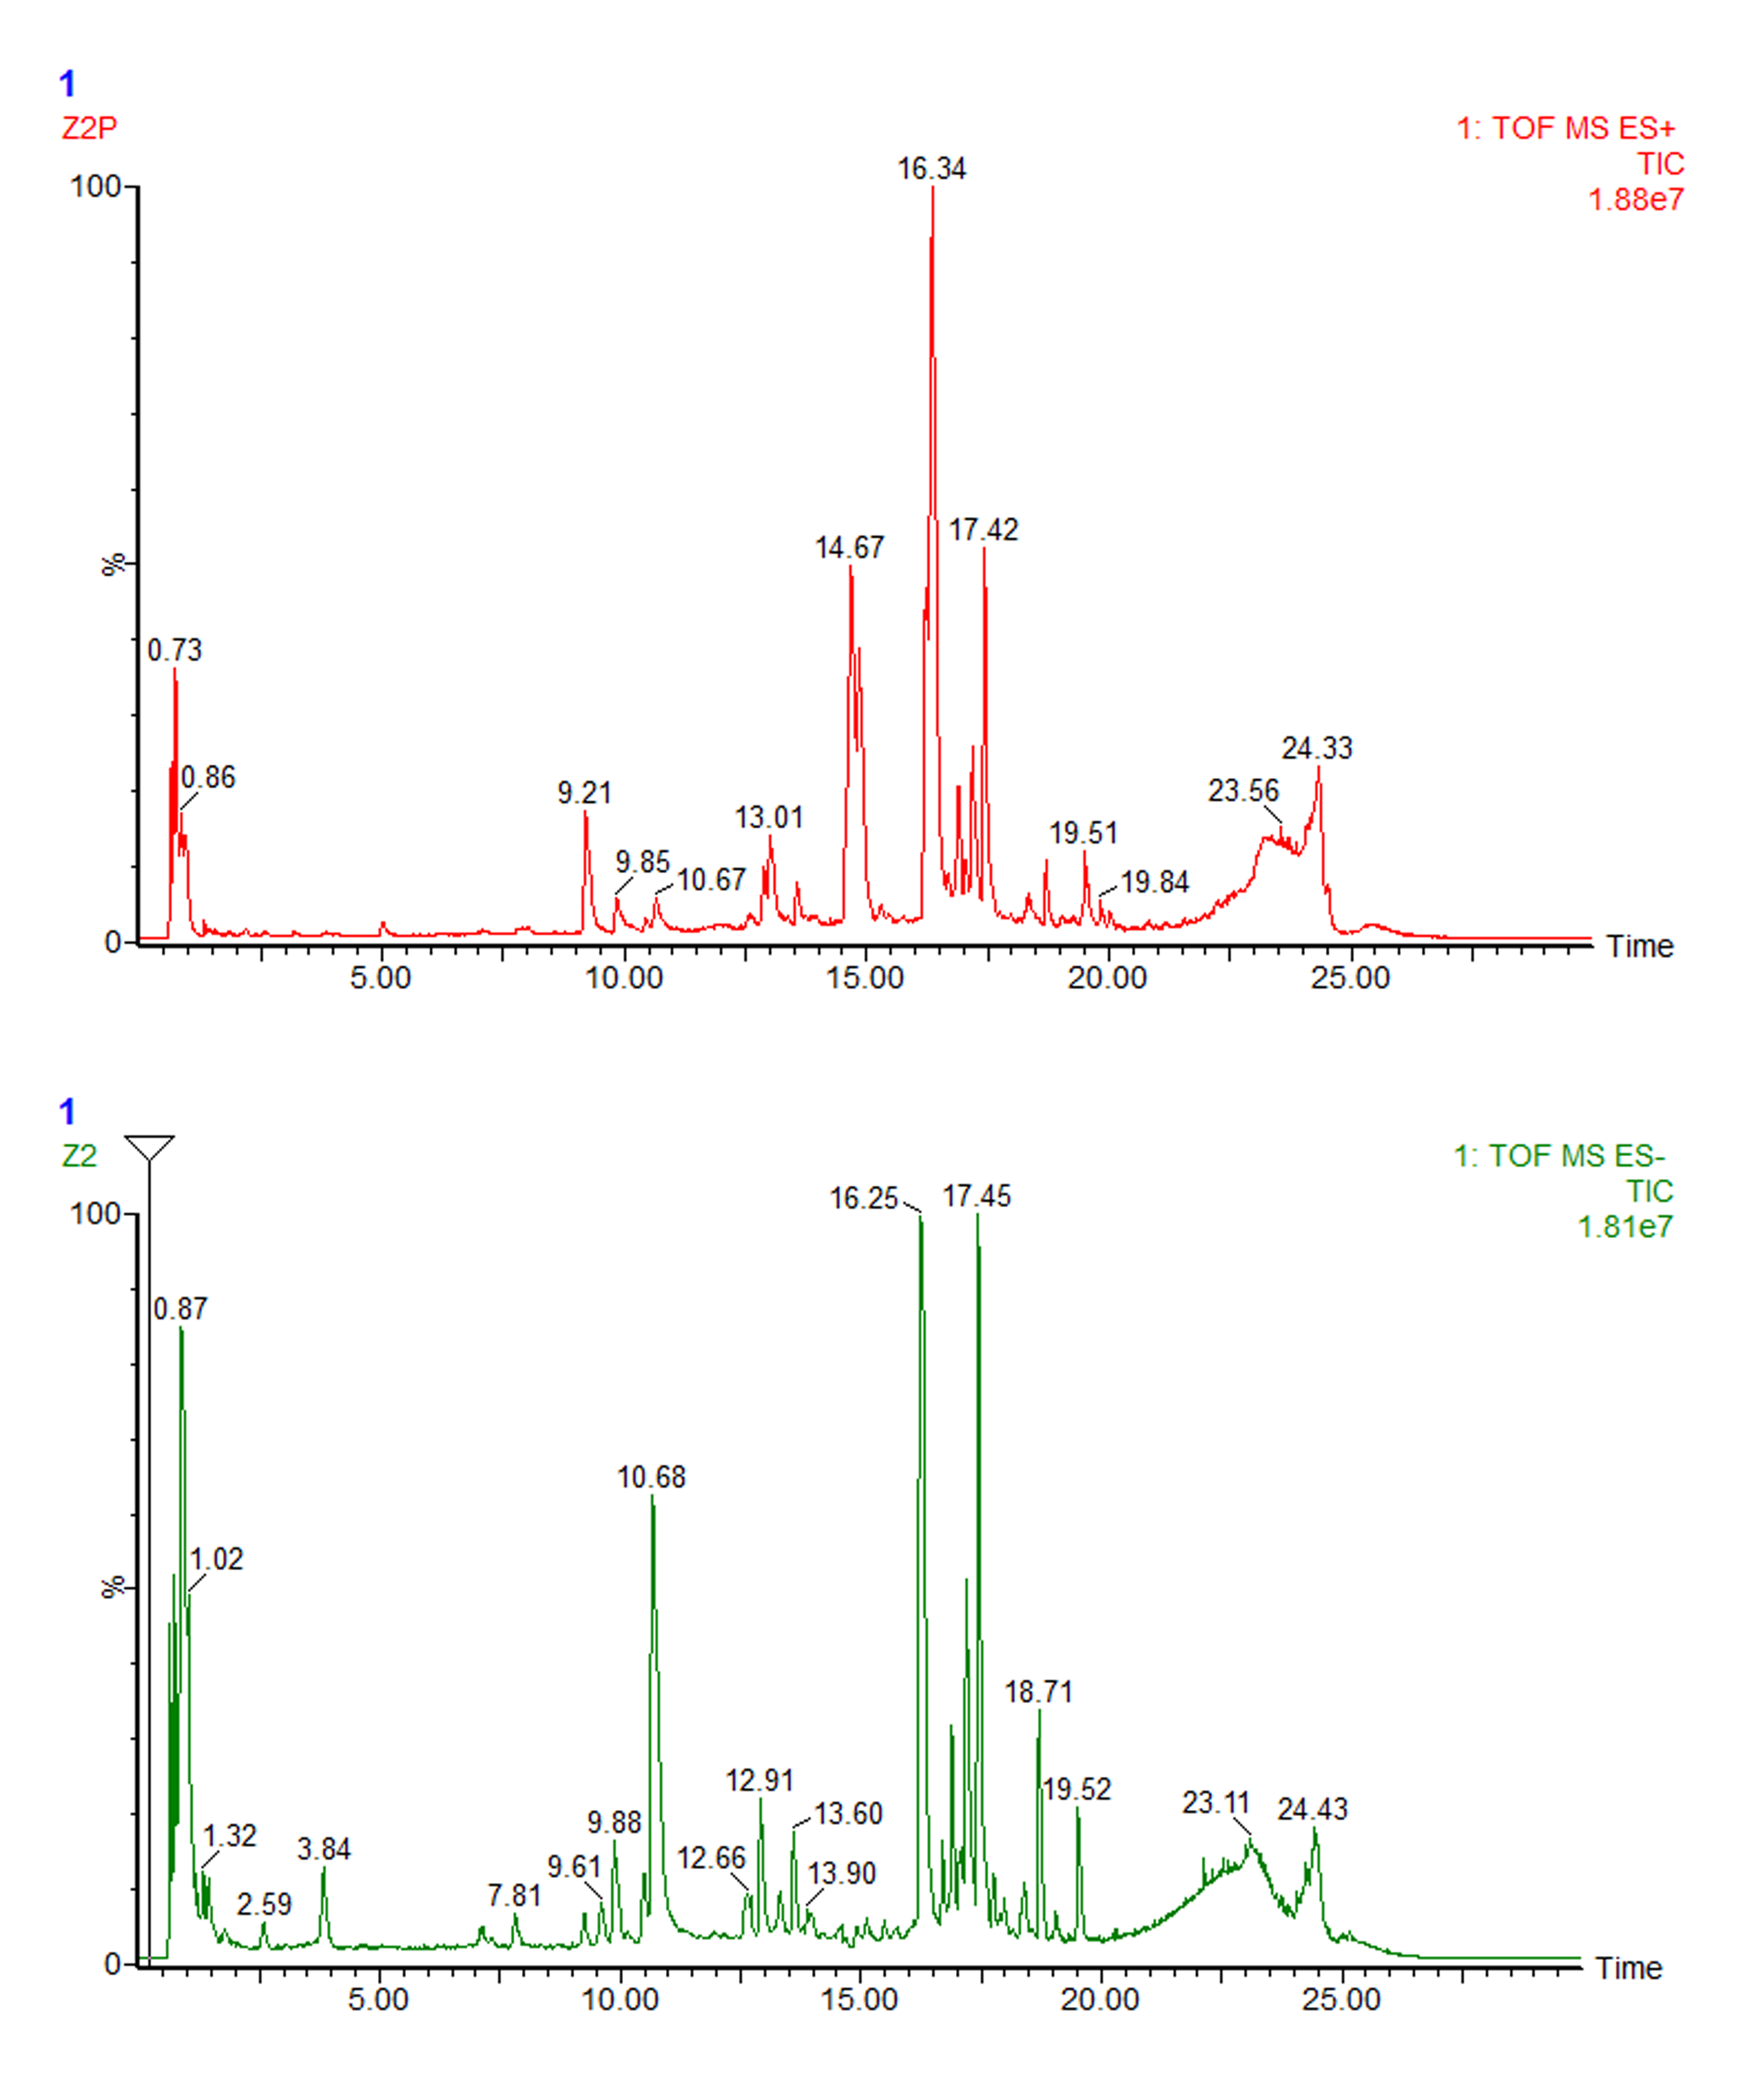
**

**Figure S2** Identification of chemical components of the second batch of SYD.

**
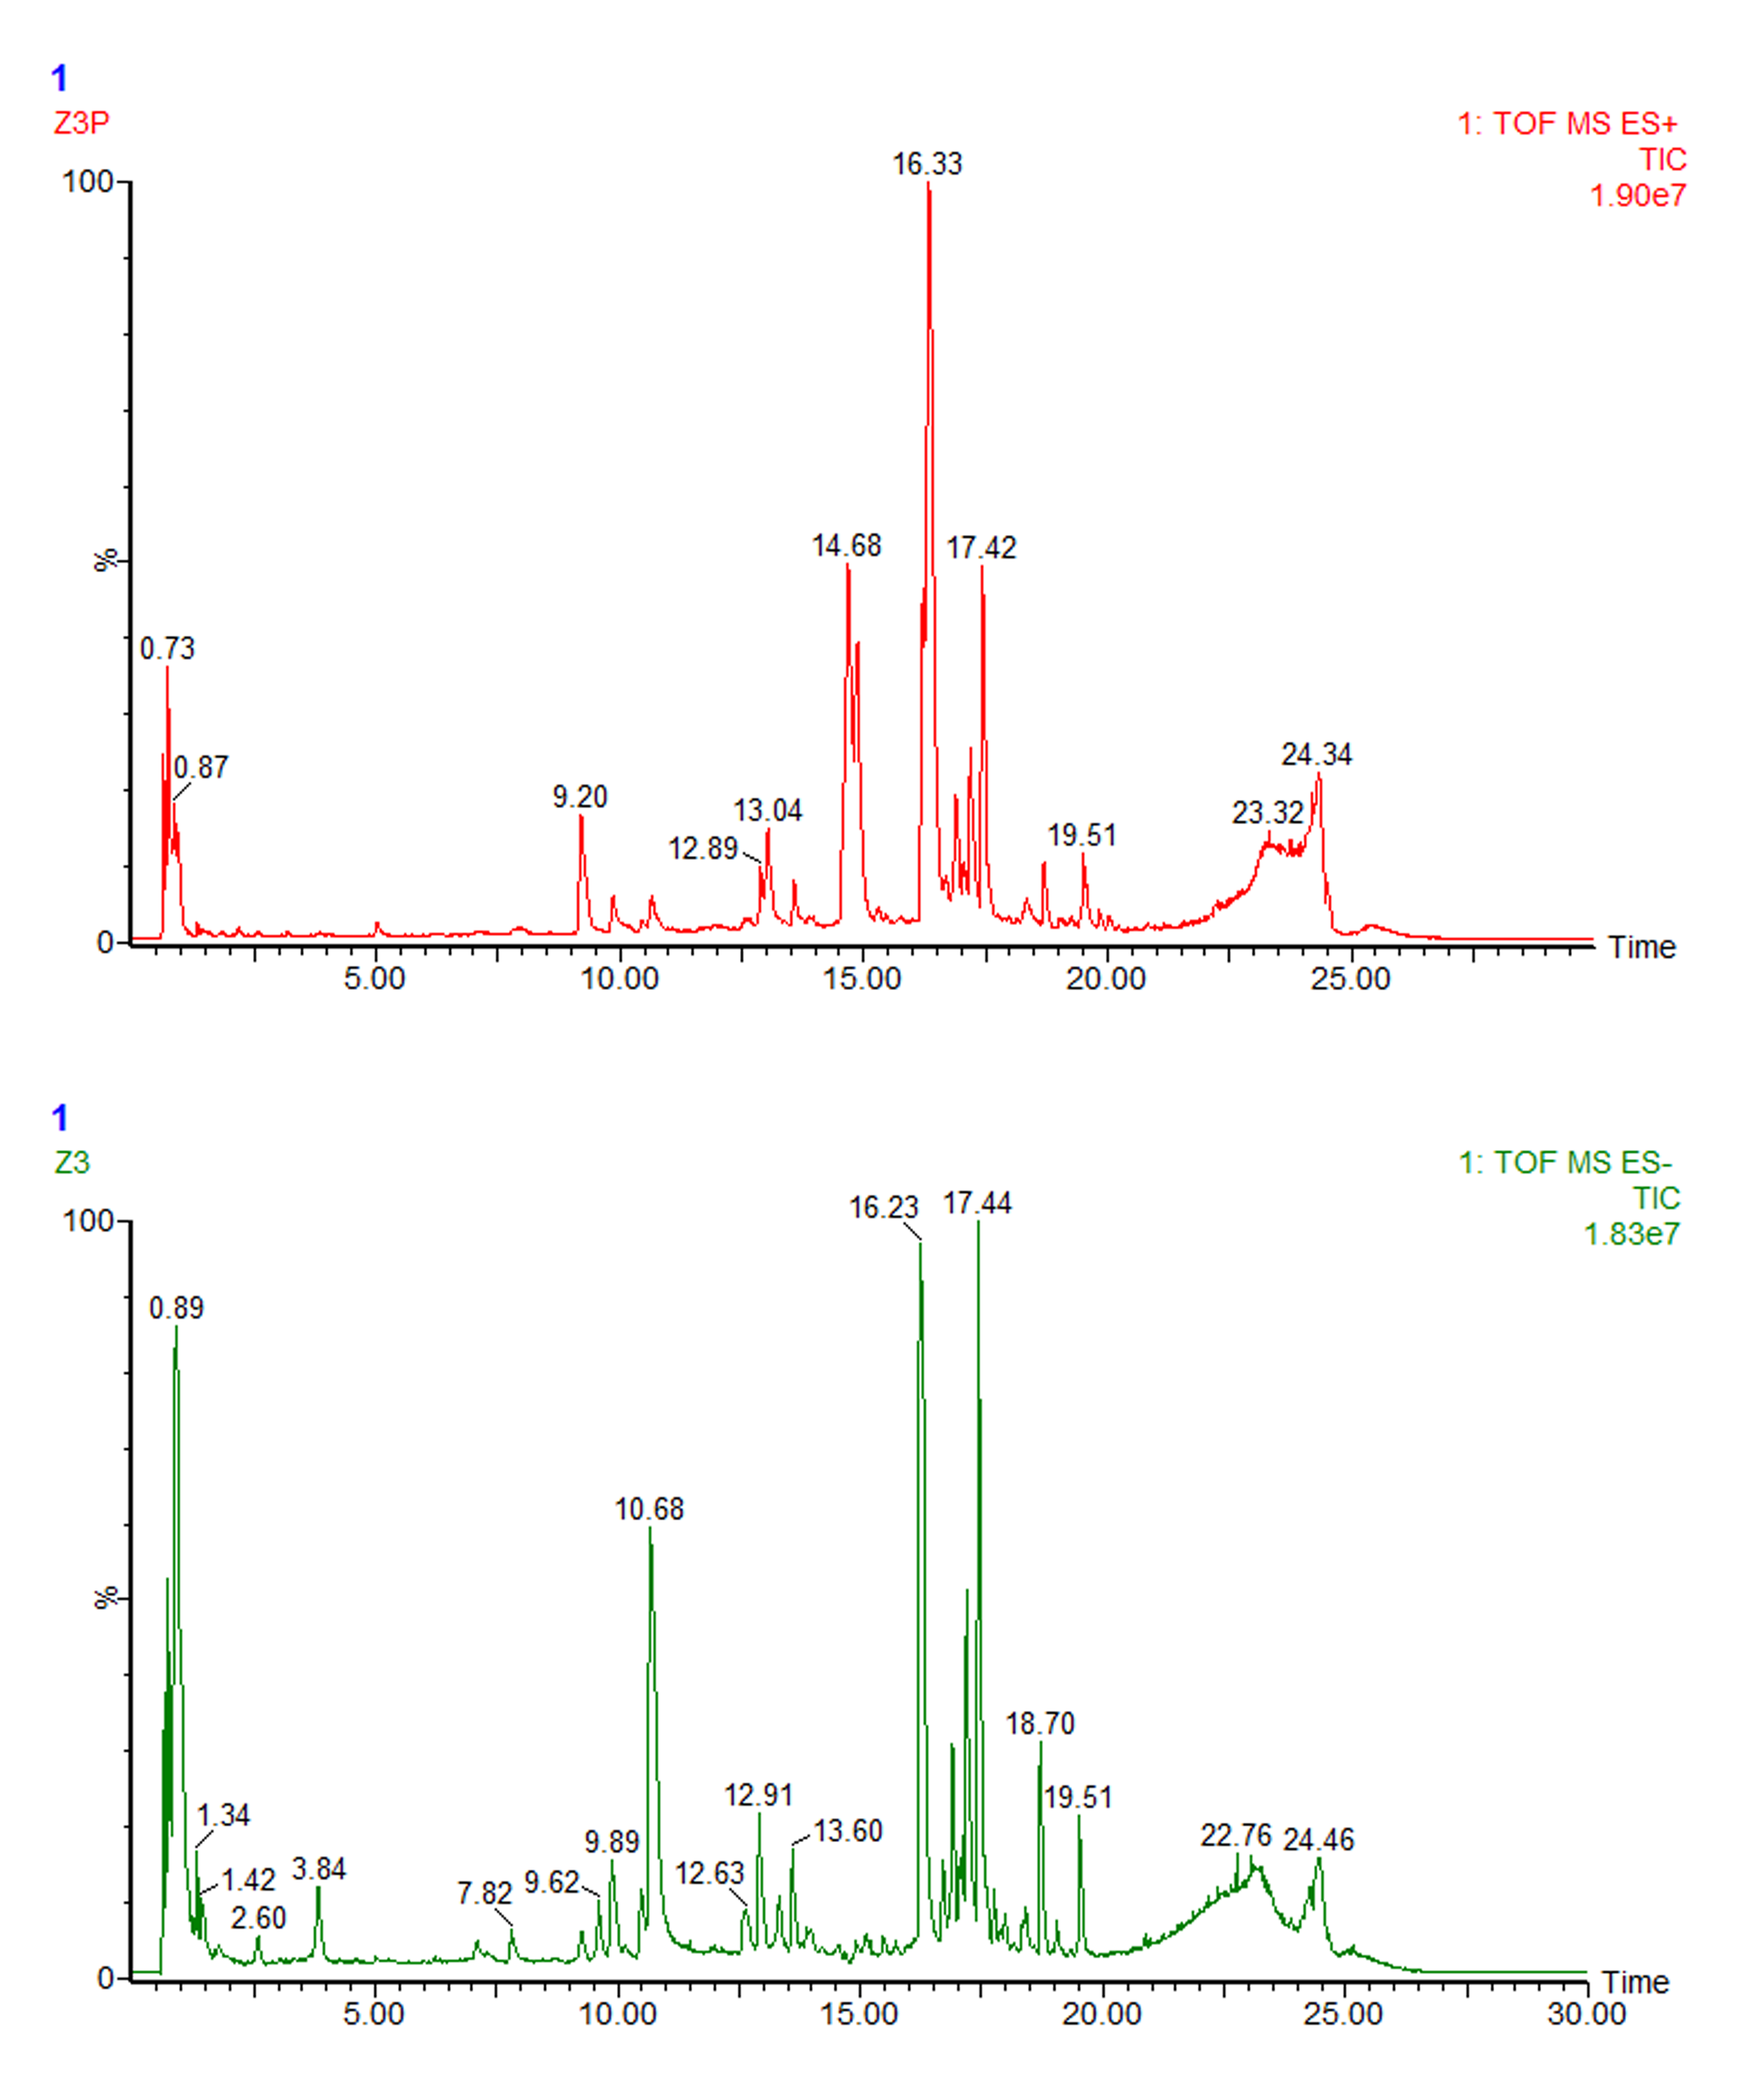
**

**Figure S3** Identification of chemical components of the three batch of SYD.

**
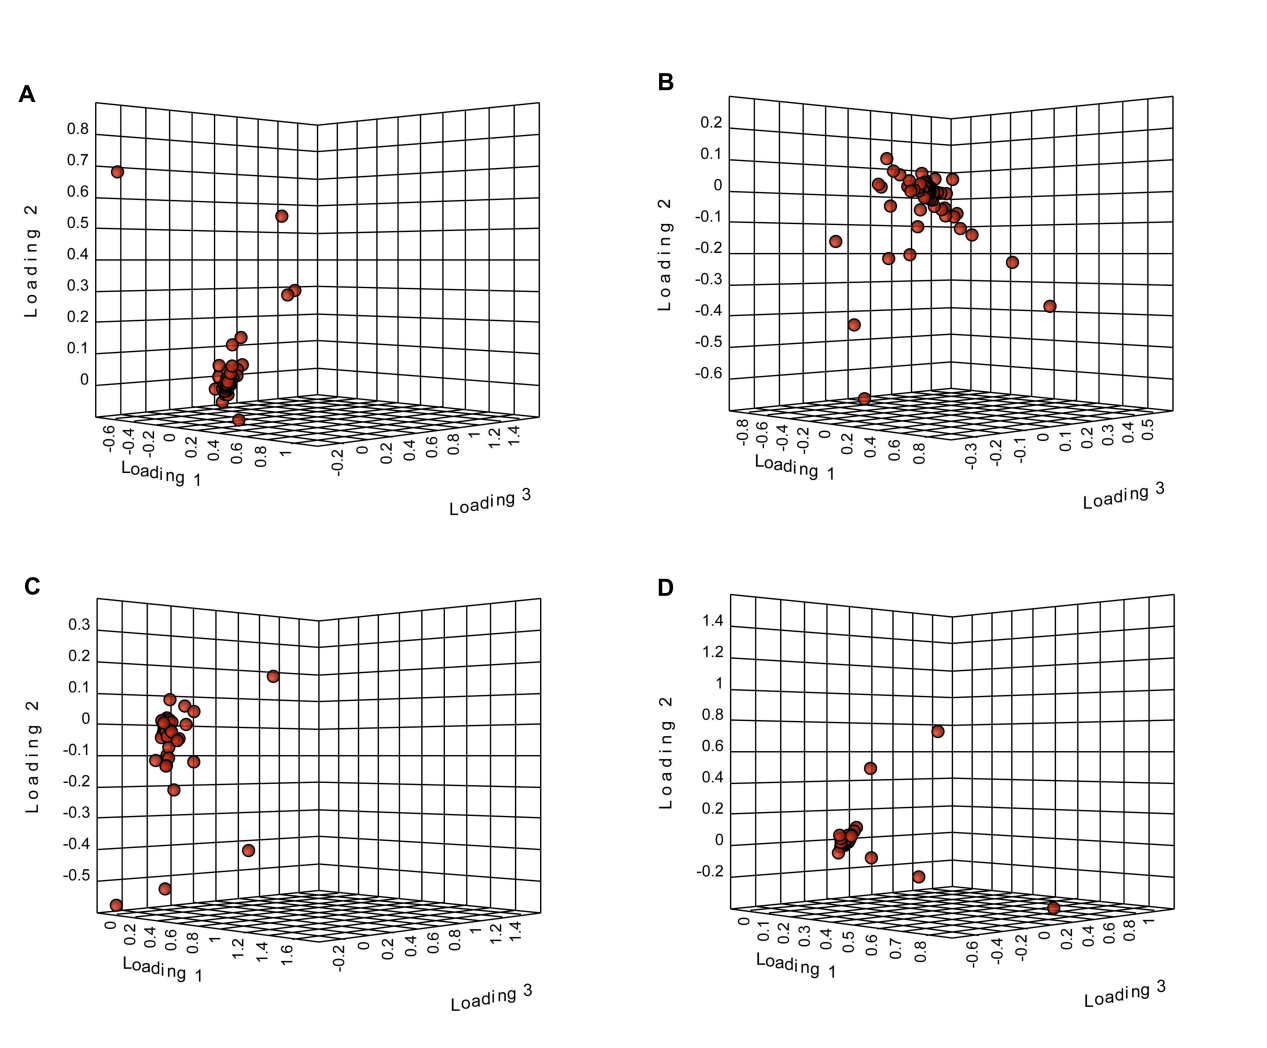
**

**Figure S4** The loading maps of principal component analysis (PCA) in mice of each group. (A, B) The loading maps of PCA of distal colon metabolic profile in mice of each group under negative and positive ion mode; (C, D) The loading maps of PCA of proximal colon metabolic profile in mice of each group under negative and positive ion mode.

## Supplementary Table

**Table S1.** Identification results of the major chemical components of SYD

| Compound | RT (min) | m/z | Adducts | Formula | Mass Error (ppm) | Isotope Similarity | Theoretical Isotope Distribution |
| --- | --- | --- | --- | --- | --- | --- | --- |
| arecoline | 1.57 | 156.1017 | M+H | C8H13NO2 | -1.44 | 95.94 | 100 - 9.24 - 0.791 |
| gallic acid | 2.57 | 171.0286 | M+H-H2O, M+H | C7H6O5 | -1.23 | 95.16 | 100 - 7.83 - 1.29 |
| chiorogenic acid | 7.30 | 353.0877 | M-H | C16H18O9 | -0.23 | 94.33 | 100 - 17.9 - 3.35 - 0.408 |
| trans-ferulic acid | 7.82 | 193.0505 | M-H | C10H10O4 | -0.88 | 94.86 | 100 - 11.1 - 1.38 - 0.107 |
| trans-ferulic acid | 10.46 | 177.0545 | M+H-H2O | C10H10O4 | -0.45 | 95.50 | 100 - 11.1 - 1.38 - 0.107 |
| liquiritin | 12.57 | 417.1179 | M-H, M+Cl | C21H22O9 | -2.77 | 96.96 | 100 - 23.3 - 4.44 - 0.614 |
| berberine | 14.42 | 381.1223 | M+FA-H | C20H18NO4+ | 1.54 | 83.88 | 100 - 22.4 - 3.2 - 0.344 |
| baicalin | 16.22 | 447.0928 | M+H, 2M+H, M+Na | C21H18O11 | 1.30 | 96.82 | 100 - 23.3 - 4.86 - 0.711 |
| kaempferol | 16.24 | 267.0291 | M-H2O-H | C15H10O6 | -2.71 | 96.09 | 100 - 16.6 - 2.52 - 0.266 |
| baicalin | 16.29 | 445.0769 | M-H | C21H18O11 | -1.70 | 97.84 | 100 - 23.3 - 4.86 - 0.711 |
| kaempferol | 17.44 | 269.0448 | M+H-H2O | C15H10O6 | 1.34 | 83.79 | 100 - 16.6 - 2.52 - 0.266 |
| formononetin | 17.56 | 313.0713 | M+FA-H | C16H12O4 | -1.80 | 94.85 | 100 - 17.6 - 2.28 - 0.219 |
| quercetin | 17.57 | 283.0239 | M-H2O-H | C15H10O7 | -2.90 | 90.47 | 100 - 16.6 - 2.73 - 0.301 |
| glycyrrhizin | 18.69 | 823.4114 | M+H, M+Na, 2M+H | C42H62O16 | 0.39 | 96.40 | 100 - 46.7 - 14 - 3.13 - 0.575 |
| glycyrrhizin | 18.70 | 821.3953 | M-H | C42H62O16 | -1.42 | 97.87 | 100 - 46.7 - 14 - 3.13 - 0.575 |
| formononetin | 18.73 | 269.0801 | M+H | C16H12O4 | -2.76 | 93.64 | 100 - 17.6 - 2.28 - 0.219 |
| quercetin | 19.60 | 285.0390 | M+H-H2O | C15H10O7 | -1.25 | 91.30 | 100 - 16.6 - 2.73 - 0.301 |
| licoisoflavone A | 20.14 | 353.1047 | M-H | C20H18O6 | 4.65 | 91.42 | 100 - 22.1 - 3.55 - 0.426 |
| liquiritin | 24.08 | 837.2567 | 2M+H | C21H22O9 | -3.97 | 87.65 | 100 - 23.3 - 4.44 - 0.614 |

**Table S2.** Identification results of the main altered metabolites in distal colon between NC group and UC group

| Compound | RT (min) | m/z | Adducts | Formula | Mass Error (ppm) | Isotope Similarity | Theoretical Isotope Distribution |
| --- | --- | --- | --- | --- | --- | --- | --- |
| N-Methylnicotinium | 0.70 | 160.1359 | M+H-H2O | C11H17N2+ | 0.00 | 93.62 | 100 - 12.8 - 0.757 |
| Galactonic acid | 0.75 | 195.0503 | M-H | C6H12O7 | -3.85 | 97.35 | 100 - 6.89 - 1.64 - 0.102 |
| Diethyl disulfide | 0.77 | 167.0202 | M+FA-H | C4H10S2 | -3.47 | 83.80 | 100 - 6.04 - 9.19 - 0.476 - 0.256 |
| Sedoheptulose | 0.79 | 245.0429 | M+Cl | C7H14O7 | -2.33 | 97.18 | 100 - 8 - 1.72 - 0.12 |
| N-Acetyl-D-Glucosamine 6-Phosphate | 0.89 | 300.0446 | M-H2O-H, M-H | C8H16NO9P | 0.59 | 96.76 | 100 - 9.54 - 2.26 - 0.186 |
| Methyl 5-(1-Propynyl)-2-thiophenepropanoate | 0.89 | 243.0256 | M+Cl | C11H12O2S | 2.00 | 90.90 | 100 - 12.9 - 5.7 - 0.628 |
| Fructose 6-phosphate | 0.89 | 241.0110 | M-H2O-H | C6H13O9P | -3.29 | 96.95 | 100 - 6.98 - 2.06 - 0.132 |
| 4-Hydroxy-5-(phenyl)-valeric acid-O-sulphate | 0.89 | 275.0591 | M+H | C11H14O6S | 2.57 | 91.16 | 100 - 13.1 - 6.54 - 0.745 - 0.125 |
| Uridine diphosphate glucose | 0.96 | 565.0471 | M-H | C15H24N2O17P2 | -1.12 | 96.95 | 100 - 17.9 - 5 - 0.703 - 0.113 |
| Hallacridone | 0.96 | 306.0762 | M-H2O-H, M-H | C18H13NO4 | 4.65 | 89.27 | 100 - 20.1 - 2.74 - 0.281 |
| Citric acid | 1.05 | 191.0189 | M-H2O-H, M-H | C6H8O7 | -1.83 | 97.94 | 100 - 6.85 - 1.64 - 0.101 |
| Phenol sulphate | 2.02 | 172.9910 | M-H | C6H6O4S | -2.40 | 93.37 | 100 - 7.51 - 5.58 - 0.369 |
| Apigenin 7-sulfate | 6.15 | 349.0032 | M-H | C15H10O8S | 2.37 | 97.45 | 100 - 17.4 - 7.59 - 1.11 - 0.192 |
| Isopropyl apiosylglucoside | 6.26 | 393.1163 | M+K | C14H26O10 | 1.56 | 93.31 | 100 - 15.8 - 3.22 - 0.378 |
| Taraxacoside | 8.53 | 421.1095 | M+NH4, M+Na, M+H | C18H22O10 | -1.27 | 96.27 | 100 - 20.1 - 3.97 - 0.527 |
| Cervonoyl ethanolamide | 9.44 | 355.2628 | M+H-H2O, M+H | C24H36O3 | -1.01 | 96.16 | 100 - 26.5 - 3.98 - 0.437 |
| PIP(16:0/20:2(11Z,14Z)) | 10.81 | 987.5195 | M-H, M+FA-H | C45H84O16P2 | -0.93 | 96.41 | 100 - 50.2 - 15.6 - 3.63 - 0.69 - 0.112 |
| Soyasaponin II | 11.26 | 957.5112 | M-H, M+FA-H | C47H76O17 | 4.75 | 92.69 | 100 - 52.4 - 16.9 - 4.08 - 0.803 - 0.135 |
| N-Palmitoyl phenylalanine | 11.88 | 438.2794 | M+Cl | C25H41NO3 | 3.34 | 86.33 | 100 - 28 - 4.39 - 0.498 |
| 3-Hydroxy-1-phenyl-1-heptadecanone | 11.88 | 391.2868 | M+FA-H | C23H38O2 | 3.97 | 95.80 | 100 - 25.4 - 3.5 - 0.344 |
| Pelargonidin 3-sophoroside | 12.16 | 616.1755 | M+Na | C28H33O14+ | -1.21 | 90.63 | 100 - 31.2 - 7.58 - 1.35 - 0.205 |
| Soyasaponin bg | 12.37 | 1113.5527 | M-H, M+FA-H | C54H84O21 | 3.29 | 89.61 | 100 - 60.2 - 22.1 - 6.04 - 1.35 - 0.257 |
| Chenodeoxycholic acid sulfate | 13.26 | 471.2435 | M-H | C24H40O7S | 2.73 | 97.18 | 100 - 27.5 - 9.59 - 1.91 - 0.32 |
| Alpha-Trisaccharide | 14.58 | 550.1893 | M+Cl | C20H37NO14 | -3.00 | 83.23 | 100 - 23 - 5.39 - 0.835 - 0.119 |
| 3b,12a-Dihydroxy-5a-cholanoic acid | 14.88 | 391.2850 | M-H, M+FA-H, M+Cl | C24H40O4 | -0.87 | 96.89 | 100 - 26.6 - 4.21 - 0.494 |
| Lepidiumterpenyl ester | 14.99 | 400.3431 | M+NH4 | C23H42O4 | 2.42 | 98.84 | 100 - 25.5 - 3.94 - 0.453 |
| Oleoylcarnitine | 15.62 | 426.3580 | M+H | C25H47NO4 | 0.55 | 97.95 | 100 - 28.1 - 4.62 - 0.56 |
| Acrimarine J | 15.64 | 576.2051 | M-H2O-H | C35H33NO8 | 3.94 | 90.50 | 100 - 38.9 - 9.01 - 1.54 - 0.213 |
| Fexofenadine | 15.76 | 502.2960 | M+H | C32H39NO4 | 1.56 | 92.39 | 100 - 35.6 - 6.96 - 0.977 - 0.108 |
| LysoPE(0:0/24:6(6Z,9Z,12Z,15Z,18Z,21Z)) | 15.93 | 552.3113 | M-H | C29H48NO7P | 3.08 | 77.79 | 100 - 32.5 - 6.57 - 0.988 - 0.121 |
| LysoPC(22:6(4Z,7Z,10Z,13Z,16Z,19Z)) | 15.95 | 568.3404 | M+H | C30H50NO7P | 1.08 | 97.14 | 100 - 33.7 - 6.93 - 1.06 - 0.132 |
| LysoPE(0:0/16:0) | 16.61 | 454.2940 | M+H, M+Na, M+H-H2O | C21H44NO7P | 2.60 | 96.97 | 100 - 23.9 - 4.16 - 0.54 |
| Chenodeoxycholic acid disulfate | 16.63 | 597.2020 | M+Cl, M+FA-H, M-H | C24H40O10S2 | 0.79 | 85.74 | 100 - 28.4 - 15 - 3.42 - 0.884 - 0.159 |
| Janthitrem C | 16.72 | 614.3466 | M+Cl, M+FA-H | C37H47NO4 | 4.44 | 90.29 | 100 - 41.1 - 9.04 - 1.4 - 0.171 |
| Tangeraxanthin | 16.86 | 523.2988 | M+K | C34H44O2 | 3.13 | 68.35 | 100 - 37.4 - 7.19 - 0.949 |
| Tridodecylamine | 17.21 | 522.5952 | M+H | C36H75N | -3.89 | 71.03 | 100 - 40.2 - 7.85 - 0.997 |
| Polysorbate 20 | 17.23 | 523.3597 | M+H-H2O, M+H | C26H50O10 | -0.01 | 90.35 | 100 - 29.1 - 6.13 - 0.963 - 0.126 |
| MG(0:0/18:1(11Z)/0:0) | 17.54 | 339.2896 | M+H-H2O | C21H40O4 | 0.59 | 96.12 | 100 - 23.3 - 3.42 - 0.375 |
| Pentigetide | 17.55 | 623.2190 | M+Cl | C22H36N8O11 | -1.21 | 93.76 | 100 - 27.6 - 5.92 - 0.934 - 0.125 |
| LysoPE(0:0/18:1(11Z)) | 17.55 | 478.2933 | M-H | C23H46NO7P | -1.18 | 97.50 | 100 - 26 - 4.69 - 0.634 |
| PE(P-16:0e/0:0) | 17.57 | 438.2993 | M+H, M+Na, M+H-H2O | C21H44NO6P | 3.30 | 96.37 | 100 - 23.8 - 3.94 - 0.49 |
| Daphniphylline | 17.74 | 526.3519 | M-H | C32H49NO5 | -3.65 | 86.11 | 100 - 35.7 - 7.22 - 1.06 - 0.124 |
| LysoPC(P-16:0) | 17.85 | 524.3344 | M+FA-H | C24H50NO6P | -2.95 | 91.84 | 100 - 27.1 - 4.77 - 0.629 |
| LysoPE(20:5(5Z,8Z,11Z,14Z,17Z)/0:0) | 18.23 | 544.2706 | M+FA-H | C25H42NO7P | 4.97 | 95.16 | 100 - 28.2 - 5.25 - 0.736 |
| LysoPE(18:0/0:0) | 18.49 | 462.2984 | M-H2O-H | C23H48NO7P | -1.29 | 96.07 | 100 - 26.1 - 4.7 - 0.635 |
| LysoPC(P-18:0) | 18.70 | 508.3750 | M+H | C26H54NO6P | -2.27 | 92.50 | 100 - 29.3 - 5.38 - 0.738 |
| LysoPC(P-18:1(9Z)) | 18.76 | 550.3533 | M+FA-H | C26H52NO6P | 3.69 | 94.86 | 100 - 29.3 - 5.38 - 0.737 |
| LysoPE(0:0/22:6(4Z,7Z,10Z,13Z,16Z,19Z)) | 19.32 | 570.2860 | M+FA-H | C27H44NO7P | 4.31 | 98.85 | 100 - 30.3 - 5.88 - 0.854 - 0.101 |
| 7-Dehydrocholesterol | 19.95 | 367.3344 | M+H-H2O | C27H44O | -3.97 | 92.99 | 100 - 29.7 - 4.47 - 0.454 |
| LysoPC(17:0) | 20.14 | 508.3403 | M-H | C25H52NO7P | -1.12 | 94.95 | 100 - 28.3 - 5.29 - 0.742 |
| Ganglioside GM3 (d18:1/18:1(11Z)) | 20.14 | 1159.7165 | M-H2O-H | C59H106N2O21 | 4.72 | 90.26 | 100 - 66.6 - 26.1 - 7.56 - 1.77 - 0.354 |
| Ganglioside GA2 (d18:1/18:0) | 20.14 | 1091.7227 | M-H | C56H104N2O18 | 1.46 | 88.85 | 100 - 63.2 - 23.3 - 6.33 - 1.39 - 0.259 |
| Avenestergenin A1 | 20.25 | 618.3809 | M-H2O-H | C38H55NO7 | 1.40 | 84.31 | 100 - 42.4 - 10.2 - 1.78 - 0.25 |
| 1-Oleoylglycerophosphoserine | 20.78 | 524.2937 | M+H-H2O, M+H, M+Na | C24H46NO9P | 4.32 | 94.14 | 100 - 27.2 - 5.41 - 0.8 |
| LysoPE(0:0/18:2(9Z,12Z)) | 20.83 | 522.2835 | M+FA-H | C23H44NO7P | -0.41 | 93.60 | 100 - 26 - 4.69 - 0.633 |
| PC(14:0/18:2(9Z,12Z)) | 20.98 | 730.5347 | M+H | C40H76NO8P | -4.69 | 68.68 | 100 - 44.8 - 11.4 - 2.13 - 0.318 |
| LysoPC(22:2(13Z,16Z)) | 21.47 | 620.3949 | M+FA-H | C30H58NO7P | 2.76 | 97.97 | 100 - 33.7 - 6.96 - 1.07 - 0.133 |
| Medroxyprogesterone | 21.59 | 325.2175 | M-H2O-H | C22H32O3 | 0.66 | 95.72 | 100 - 24.3 - 3.43 - 0.358 |
| LysoPE(0:0/22:5(4Z,7Z,10Z,13Z,16Z)) | 21.62 | 572.3017 | M+FA-H | C27H46NO7P | 4.41 | 98.51 | 100 - 30.4 - 5.89 - 0.856 - 0.101 |
| MG(0:0/20:3(11Z,14Z,17Z)/0:0) | 22.12 | 381.3006 | M+H-H2O, M+H | C23H40O4 | -0.34 | 98.62 | 100 - 25.5 - 3.94 - 0.452 |
| Erythrodiol 3-palmitate | 22.13 | 715.5779 | M+Cl | C46H80O3 | -3.37 | 79.30 | 100 - 50.8 - 13.2 - 2.36 - 0.323 |
| PC(18:1(11Z)/20:3(5Z,8Z,11Z)) | 22.38 | 832.5792 | M+Na | C46H84NO8P | -4.26 | 34.35 | 100 - 51.4 - 14.6 - 2.97 - 0.48 |
| Cardanolmonoene | 22.39 | 283.2429 | M-H2O-H | C21H34O | -0.61 | 95.91 | 100 - 23.1 - 2.76 - 0.226 |
| PE(18:4(6Z,9Z,12Z,15Z)/P-18:0) | 22.39 | 724.5260 | M+H | C41H74NO7P | -2.11 | 74.76 | 100 - 45.8 - 11.7 - 2.15 - 0.316 |
| MG(0:0/16:0/0:0) | 22.60 | 313.2749 | M+H-H2O, M+Na | C19H38O4 | 3.68 | 97.85 | 100 - 21.1 - 2.95 - 0.308 |
| PC(14:0/22:4(7Z,10Z,13Z,16Z)) | 22.62 | 804.5496 | M+Na | C44H80NO8P | -2.24 | 86.80 | 100 - 49.2 - 13.5 - 2.67 - 0.42 |
| PA(20:0/12:0) | 22.62 | 629.4554 | M-H2O-H | C35H69O8P | 0.43 | 97.12 | 100 - 39 - 9.03 - 1.55 - 0.214 |
| DG(18:2n6/0:0/18:4n3) | 22.62 | 607.4746 | M-H2O-H | C40H66O5 | 2.33 | 96.96 | 100 - 44.2 - 10.6 - 1.79 - 0.239 |
| Glycerol 1,3-didodecanoate 2-decanoate | 22.63 | 628.5494 | M+NH4 | C37H70O6 | -2.73 | 86.20 | 100 - 41.1 - 9.44 - 1.57 - 0.208 |
| PC(15:0/20:5(5Z,8Z,11Z,14Z,17Z)) | 22.77 | 748.5268 | M+H-H2O, M+H | C43H76NO8P | -0.94 | 89.97 | 100 - 48.1 - 12.9 - 2.52 - 0.391 |
| PC(14:0/18:1(11Z)) | 22.77 | 732.5540 | M+H | C40H78NO8P | 0.26 | 89.31 | 100 - 44.8 - 11.5 - 2.13 - 0.319 |
| Norfloxacin | 22.77 | 337.1666 | M+NH4 | C16H18FN3O3 | -1.54 | 96.96 | 100 - 18.7 - 2.27 - 0.207 |
| Peltatol C | 22.78 | 661.4015 | M+Cl | C42H58O4 | -2.33 | 65.06 | 100 - 46.2 - 11.3 - 1.92 - 0.254 |
| PC(16:0/22:5(4Z,7Z,10Z,13Z,16Z)) | 22.78 | 808.5813 | M+H, M+Na, M+K, M+H-H2O | C46H82NO8P | -4.65 | 85.95 | 100 - 51.4 - 14.6 - 2.97 - 0.48 |
| Lactosylceramide (d18:1/12:0) | 22.78 | 806.5652 | M+H, M+Na | C42H79NO13 | 3.40 | 87.70 | 100 - 47.2 - 13.6 - 2.9 - 0.504 |
| PG(18:0/18:2(9Z,12Z)) | 22.78 | 792.5740 | M+NH4 | C42H79O10P | -1.19 | 88.86 | 100 - 46.7 - 12.7 - 2.55 - 0.411 |
| PE-NMe(18:1(11Z)/20:1(11Z)) | 22.78 | 786.5978 | M+H | C44H84NO8P | -3.71 | 88.25 | 100 - 49.2 - 13.5 - 2.67 - 0.421 |
| PC(16:0/18:2(9Z,12Z)) | 22.78 | 758.5694 | M+H | C42H80NO8P | -0.09 | 88.89 | 100 - 47 - 12.5 - 2.39 - 0.367 |
| SM C16:1 | 22.78 | 754.5398 | M+K | C40H80N2O6P+ | 1.75 | 88.80 | 100 - 45.1 - 11.2 - 1.98 - 0.279 |
| PC(16:0/16:0) | 22.78 | 734.5672 | M+H | C40H80NO8P | -3.09 | 97.44 | 100 - 44.9 - 11.5 - 2.14 - 0.319 |
| PC(15:0/18:3(6Z,9Z,12Z)) | 22.78 | 724.5247 | M+H-H2O | C41H76NO8P | -3.93 | 50.11 | 100 - 45.9 - 11.9 - 2.26 - 0.341 |
| 6,10,14-Trimethyl-5,9,13-pentadecatrien-2-one | 22.78 | 263.2379 | M+H-H2O, M+H | C18H30O | 2.46 | 97.36 | 100 - 19.9 - 2.07 - 0.151 |
| PC(18:1(11Z)/22:6(4Z,7Z,10Z,13Z,16Z,19Z)) | 22.80 | 854.5636 | M+Na | C48H82NO8P | -4.12 | 76.47 | 100 - 53.5 - 15.7 - 3.29 - 0.546 |
| PC(16:0/24:1(15Z)) | 22.80 | 844.6794 | M+H | C48H94NO8P | 0.48 | 79.94 | 100 - 53.7 - 15.8 - 3.31 - 0.55 |
| PE(16:0/22:5(4Z,7Z,10Z,13Z,16Z)) | 22.81 | 746.5158 | M-H2O-H, M+FA-H, M-H | C43H76NO8P | 3.67 | 86.70 | 100 - 48.1 - 12.9 - 2.52 - 0.391 |
| PC(DiMe(9,3)/MonoMe(11,3)) | 22.99 | 869.5389 | M+FA-H | C45H79NO10P+ | -4.18 | 59.41 | 100 - 50.3 - 14.5 - 3.03 - 0.509 |
| Licoricesaponin F3 | 23.01 | 933.4531 | M-H2O-H | C48H72O19 | 4.35 | 70.16 | 100 - 53.5 - 17.9 - 4.49 - 0.92 - 0.162 |
| DG(16:0/22:4(7Z,10Z,13Z,16Z)/0:0) | 23.05 | 627.5340 | M+H-H2O | C41H72O5 | -1.09 | 68.74 | 100 - 45.4 - 11.1 - 1.91 - 0.26 |
| PE(16:0/P-18:1(11Z)) | 23.11 | 724.5249 | M+Na | C39H76NO7P | -0.40 | 44.09 | 100 - 43.7 - 10.8 - 1.92 - 0.274 |
| PG(a-13:0/i-16:0) | 23.21 | 698.4994 | M+NH4 | C35H69O10P | 4.00 | 90.47 | 100 - 39 - 9.47 - 1.71 - 0.253 |
| N-Palmitoylsphingosine | 23.27 | 560.5007 | M+Na | C34H67NO3 | -1.14 | 87.95 | 100 - 38 - 7.65 - 1.08 - 0.118 |
| PC(16:0/22:6(4Z,7Z,10Z,13Z,16Z,19Z)) | 23.29 | 828.5501 | M+Na | C46H80NO8P | -1.63 | 87.78 | 100 - 51.3 - 14.6 - 2.96 - 0.479 |
| Araliacerebroside | 23.29 | 754.5434 | M+Na | C40H77NO10 | -0.82 | 87.63 | 100 - 44.9 - 11.9 - 2.33 - 0.368 |
| SM(d18:0/16:1(9Z)) | 23.29 | 703.5734 | M+H | C39H79N2O6P | -2.08 | 91.47 | 100 - 44 - 10.7 - 1.87 - 0.258 |
| Lathosterol | 23.31 | 369.3518 | M+H-H2O | C27H46O | 0.49 | 95.55 | 100 - 29.8 - 4.48 - 0.455 |
| LysoPC(22:1(13Z)) | 23.44 | 578.4167 | M+H | C30H60NO7P | -2.20 | 94.55 | 100 - 33.8 - 6.96 - 1.07 - 0.133 |
| 20-Dihydrodydrogesterone | 23.48 | 355.2642 | M+FA-H | C23H34 | -0.14 | 98.60 | 100 - 25.3 - 3.06 - 0.236 |
| PA(16:0/18:2(9Z,12Z)) | 23.54 | 671.4675 | M-H | C37H69O8P | 2.68 | 80.11 | 100 - 41.1 - 9.88 - 1.75 - 0.249 |
| Ginkgoic acid | 23.80 | 369.2391 | M+Na | C22H34O3 | -2.65 | 96.89 | 100 - 24.3 - 3.44 - 0.358 |
| Neriantogenin | 23.96 | 395.2202 | M+Na | C23H32O4 | 2.56 | 95.49 | 100 - 25.4 - 3.91 - 0.448 |
| Kinetensin 1-3 | 24.17 | 397.1958 | M+K | C15H30N6O4 | -0.56 | 92.02 | 100 - 18.9 - 2.52 - 0.251 |
| Digoxigenin monodigitoxoside | 24.42 | 555.2753 | M+Cl | C29H44O8 | 4.31 | 97.70 | 100 - 32.2 - 6.65 - 1.03 - 0.13 |

**Table S3.** Identification results of the main altered metabolites in distal colon between UC group and SYD group

| Compound | RT (min) | m/z | Adducts | Formula | Mass Error (ppm) | Isotope Similarity | Theoretical Isotope Distribution |
| --- | --- | --- | --- | --- | --- | --- | --- |
| (S)-Annocherine A | 0.72 | 280.0981 | M+H-H2O, M+NH4 | C17H15NO4 | 4.14 | 90.49 | 100 - 19.1 - 2.54 - 0.254 |
| Oxidized glutathione | 0.73 | 611.1457 | M-H | C20H32N6O12S2 | 1.73 | 96.56 | 100 - 26.2 - 14.8 - 3.22 - 0.876 - 0.154 |
| Uridine diphosphate glucose | 0.96 | 565.0471 | M-H | C15H24N2O17P2 | -1.12 | 96.95 | 100 - 17.9 - 5 - 0.703 - 0.113 |
| 2,4,6,8-Decatetraenoic acid dehydropiperidide | 0.97 | 268.1095 | M+K | C15H19NO | -1.56 | 91.26 | 100 - 16.8 - 1.54 |
| Indoxyl sulfate | 2.24 | 212.0021 | M-H | C8H7NO4S | -0.89 | 94.06 | 100 - 10.1 - 5.8 - 0.513 |
| 7-Hydroxydehydroglaucine | 5.44 | 352.1557 | M+H-H2O | C21H23NO5 | 3.63 | 91.02 | 100 - 23.5 - 3.67 - 0.43 |
| gamma-Glutamyl-S-methylcysteinyl-beta-alanine | 5.48 | 336.1229 | M+H | C12H21N3O6S | 1.66 | 92.14 | 100 - 15.3 - 6.85 - 0.895 - 0.143 |
| Isopropyl apiosylglucoside | 6.26 | 393.1163 | M+K | C14H26O10 | 1.56 | 93.31 | 100 - 15.8 - 3.22 - 0.378 |
| Taraxacoside | 8.53 | 421.1095 | M+NH4, M+Na, M+H | C18H22O10 | -1.27 | 96.27 | 100 - 20.1 - 3.97 - 0.527 |
| 5-(3',5'-Dihydroxyphenyl)-gamma-valerolactone-O-glucuronide-O-methyl | 9.41 | 416.1547 | M+H, M+NH4 | C18H22O10 | -0.15 | 93.21 | 100 - 20.1 - 3.97 - 0.527 |
| 3a,7a,12b-Trihydroxy-5b-cholanoic acid | 9.75 | 453.2859 | M+FA-H | C24H40O5 | 0.36 | 97.19 | 100 - 26.6 - 4.43 - 0.551 |
| Trihexosylceramide (d18:1/9Z-18:1) | 11.69 | 1050.6979 | M+H | C54H99NO18 | 4.24 | 53.65 | 100 - 60.6 - 21.7 - 5.76 - 1.24 - 0.226 |
| (R)-3-Hydroxy-Octadecanoic acid | 11.98 | 318.2997 | M+NH4 | C18H36O3 | -1.98 | 96.69 | 100 - 20 - 2.51 - 0.236 |
| PIP3(18:1(11Z)/18:1(11Z)) | 12.06 | 1120.4931 | M+NH4 | C45H86O22P4 | 2.86 | 58.17 | 100 - 50.5 - 17 - 4.3 - 0.9 - 0.162 |
| Phytyl acetate | 14.42 | 356.3520 | M+NH4 | C22H42O2 | -0.91 | 90.35 | 100 - 24.4 - 3.25 - 0.31 |
| Rhodin G7 | 14.76 | 593.2412 | M+H-H2O | C34H34N4O7 | 2.79 | 88.94 | 100 - 38.9 - 8.8 - 1.46 - 0.195 |
| Physalin K | 14.76 | 539.1572 | M-H2O-H | C28H30O12 | 2.34 | 72.13 | 100 - 31.1 - 7.13 - 1.22 - 0.174 |
| Tangeraxanthin | 16.86 | 523.2988 | M+K | C34H44O2 | 3.13 | 68.35 | 100 - 37.4 - 7.19 - 0.949 |
| 1-Desulfoyessotoxin | 17.00 | 1080.5608 | M+NH4 | C55H82O18S | 4.53 | 84.21 | 100 - 61.9 - 27.1 - 8.81 - 2.33 - 0.52 - 0.101 |
| Notoginsenoside H | 17.74 | 947.5250 | M-H | C47H80O19 | 3.08 | 91.91 | 100 - 52.5 - 17.4 - 4.31 - 0.878 - 0.153 |
| LysoPC(20:2(11Z,14Z)) | 19.09 | 548.3710 | M+H | C28H54NO7P | -0.14 | 93.12 | 100 - 31.5 - 6.25 - 0.925 - 0.111 |
| Natamycin | 19.10 | 664.2967 | M-H | C33H47NO13 | -1.19 | 96.67 | 100 - 37.1 - 9.36 - 1.77 - 0.277 |
| Phthalic acid | 19.25 | 149.0239 | M+H-H2O | C8H6O4 | 3.30 | 96.66 | 100 - 8.87 - 1.17 |
| PC(14:0/22:0) | 19.92 | 812.6156 | M+Na | C44H88NO8P | 2.02 | 81.98 | 100 - 49.3 - 13.5 - 2.68 - 0.422 |
| PC(14:0/18:2(9Z,12Z)) | 20.98 | 730.5347 | M+H | C40H76NO8P | -4.69 | 68.68 | 100 - 44.8 - 11.4 - 2.13 - 0.318 |
| LysoPC(22:2(13Z,16Z)) | 21.47 | 620.3949 | M+FA-H | C30H58NO7P | 2.76 | 97.97 | 100 - 33.7 - 6.96 - 1.07 - 0.133 |
| LysoPE(0:0/22:5(4Z,7Z,10Z,13Z,16Z)) | 21.62 | 572.3017 | M+FA-H | C27H46NO7P | 4.41 | 98.51 | 100 - 30.4 - 5.89 - 0.856 - 0.101 |
| PE(20:1(11Z)/22:6(4Z,7Z,10Z,13Z,16Z,19Z)) | 21.95 | 862.5616 | M+FA-H | C47H80NO8P | 1.53 | 94.93 | 100 - 52.4 - 15.1 - 3.12 - 0.511 |
| L-Histidinol | 21.95 | 124.0873 | M+H-H2O | C6H11N3O | 2.69 | 94.98 | 100 - 7.75 - 0.469 |
| MG(0:0/20:3(11Z,14Z,17Z)/0:0) | 22.12 | 381.3006 | M+H-H2O, M+H | C23H40O4 | -0.34 | 98.62 | 100 - 25.5 - 3.94 - 0.452 |
| Erythrodiol 3-palmitate | 22.13 | 715.5779 | M+Cl | C46H80O3 | -3.37 | 79.30 | 100 - 50.8 - 13.2 - 2.36 - 0.323 |
| PG(a-13:0/a-17:0) | 22.32 | 693.4678 | M-H | C36H71O10P | -4.92 | 87.65 | 100 - 40.1 - 9.9 - 1.82 - 0.272 |
| PC(18:1(11Z)/20:3(5Z,8Z,11Z)) | 22.38 | 832.5792 | M+Na | C46H84NO8P | -4.26 | 34.35 | 100 - 51.4 - 14.6 - 2.97 - 0.48 |
| DG(14:0/20:3(5Z,8Z,11Z)/0:0) | 22.60 | 573.4871 | M+H-H2O | C37H66O5 | -1.10 | 91.95 | 100 - 41 - 9.2 - 1.48 - 0.188 |
| Lactosamine | 22.60 | 359.1667 | M+NH4 | C12H23NO10 | 1.89 | 92.25 | 100 - 14 - 2.96 - 0.323 |
| Ginsenoside Rh5 | 22.62 | 697.4500 | M+FA-H | C37H64O9 | -4.99 | 95.59 | 100 - 41.1 - 10.1 - 1.83 - 0.269 |
| PA(20:0/12:0) | 22.62 | 629.4554 | M-H2O-H | C35H69O8P | 0.43 | 97.12 | 100 - 39 - 9.03 - 1.55 - 0.214 |
| 2-Pentadecylfuran | 22.62 | 259.2432 | M-H2O-H | C19H34O | 0.42 | 95.33 | 100 - 21 - 2.29 - 0.174 |
| Cer(t18:0/16:0) | 22.77 | 556.5295 | M+H | C34H69NO4 | -0.84 | 87.39 | 100 - 38.1 - 7.87 - 1.16 - 0.134 |
| Lactosylceramide (d18:1/12:0) | 22.78 | 806.5652 | M+H, M+Na | C42H79NO13 | 3.40 | 87.70 | 100 - 47.2 - 13.6 - 2.9 - 0.504 |
| PC(18:1(11Z)/22:6(4Z,7Z,10Z,13Z,16Z,19Z)) | 22.80 | 854.5636 | M+Na | C48H82NO8P | -4.12 | 76.47 | 100 - 53.5 - 15.7 - 3.29 - 0.546 |
| N-Undecylbenzenesulfonic acid | 22.80 | 335.1655 | M+Na | C17H28O3S | 1.16 | 90.37 | 100 - 19.6 - 6.96 - 1.08 - 0.141 |
| TG(14:0/15:0/20:5(5Z,8Z,11Z,14Z,17Z)) | 22.95 | 855.6729 | M+FA-H | C52H90O6 | 1.24 | 80.75 | 100 - 57.5 - 17.5 - 3.71 - 0.613 |
| PC(DiMe(9,3)/MonoMe(11,3)) | 22.99 | 869.5389 | M+FA-H | C45H79NO10P+ | -4.18 | 59.41 | 100 - 50.3 - 14.5 - 3.03 - 0.509 |
| PS(15:0/24:1(15Z)) | 23.04 | 830.5940 | M-H, M+FA-H, M-H2O-H | C45H86NO10P | 2.86 | 75.86 | 100 - 50.4 - 14.5 - 3.04 - 0.511 |
| 2-amino-4-({1-[(carboxymethyl)-C-hydroxycarbonimidoyl]-2-{[2-hydroxy-1-(4-methoxyphenyl)-3-oxopentyl]sulfanyl}ethyl}-C-hydroxycarbonimidoyl)butanoic acid | 23.13 | 536.1651 | M+Na | C22H31N3O9S | -4.28 | 73.56 | 100 - 26.4 - 9.72 - 1.92 - 0.34 |
| PC(16:0/22:6(4Z,7Z,10Z,13Z,16Z,19Z)) | 23.29 | 828.5501 | M+Na | C46H80NO8P | -1.63 | 87.78 | 100 - 51.3 - 14.6 - 2.96 - 0.479 |
| Albafuran A | 23.29 | 361.1813 | M+H-H2O | C24H26O4 | 3.85 | 92.16 | 100 - 26.4 - 4.17 - 0.488 |
| PA(P-16:0e/18:2(9Z,12Z)) | 23.45 | 691.4493 | M+Cl | C37H69O7P | 2.73 | 62.41 | 100 - 41.1 - 9.66 - 1.66 - 0.228 |
| PA(16:0/18:2(9Z,12Z)) | 23.54 | 671.4675 | M-H | C37H69O8P | 2.68 | 80.11 | 100 - 41.1 - 9.88 - 1.75 - 0.249 |
| PS(18:0/20:3(8Z,11Z,14Z)) | 23.92 | 836.5408 | M+Na | C44H80NO10P | -0.47 | 70.62 | 100 - 49.3 - 13.9 - 2.88 - 0.478 |
| Cisapride | 24.12 | 446.1636 | M-H2O-H | C23H29ClFN3O4 | -3.58 | 72.79 | 100 - 26.5 - 36.1 - 8.95 - 1.38 - 0.16 |
| Kinetensin 1-3 | 24.17 | 397.1958 | M+K | C15H30N6O4 | -0.56 | 92.02 | 100 - 18.9 - 2.52 - 0.251 |
| Swertiajaponin | 24.42 | 443.0973 | M-H2O-H | C22H22O11 | -2.40 | 34.26 | 100 - 24.5 - 5.12 - 0.766 |

**Table S4.** Identification results of the main altered metabolites in proximal colon between NC group and UC group

| Compound | RT (min) | m/z | Adducts | Formula | Mass Error (ppm) | Isotope Similarity | Theoretical Isotope Distribution |
| --- | --- | --- | --- | --- | --- | --- | --- |
| Oxidized glutathione | 0.73 | 611.1427 | M-H | C20H32N6O12S2 | -3.23 | 97.08 | 100 - 26.2 - 14.8 - 3.22 - 0.876 - 0.154 |
| Hydrogen phosphate | 0.90 | 78.9593 | M-H2O-H | H3O4P | 2.72 | 86.40 | 100 - 0.187 - 0.822 |
| Acetyl citrate | 1.02 | 467.0677 | 2M-H | C8H10O8 | -0.42 | 93.95 | 100 - 9.07 - 2.01 - 0.157 |
| p-Cresol glucuronide | 2.43 | 283.0814 | M-H | C13H16O7 | -3.19 | 97.04 | 100 - 14.5 - 2.42 - 0.249 |
| 5-L-Glutamyl-taurine | 5.73 | 253.0493 | M-H | C7H14N2O6S | -2.86 | 93.43 | 100 - 9.49 - 6.16 - 0.52 - 0.103 |
| Apigenin 7-sulfate | 6.16 | 349.0008 | M-H | C15H10O8S | -4.52 | 96.24 | 100 - 17.4 - 7.59 - 1.11 - 0.192 |
| Isopropyl apiosylglucoside | 6.39 | 393.1161 | M+K | C14H26O10 | 0.85 | 95.68 | 100 - 15.8 - 3.22 - 0.378 |
| Aromadendrin | 7.65 | 269.0442 | M-H2O-H | C15H12O6 | -4.57 | 95.34 | 100 - 16.6 - 2.52 - 0.266 |
| Alpha-Linolenoyl-CoA | 8.81 | 1050.3163 | M+Na | C39H64N7O17P3S | -2.04 | 58.11 | 100 - 46.9 - 18.8 - 5.33 - 1.26 - 0.25 |
| Cyclolinopeptide G | 8.84 | 1120.4943 | M+Na | C56H75N9O10S2 | -2.55 | 46.23 | 100 - 66.7 - 33 - 12 - 3.58 - 0.898 - 0.194 |
| 3-Hydroxyhexacosanoyl-CoA | 8.89 | 1200.4613 | M+K | C47H86N7O18P3S | 1.63 | 53.17 | 100 - 55.9 - 23.5 - 7.3 - 1.85 - 0.398 |
| CDP-DG(18:2(9Z,12Z)/22:6(4Z,7Z,10Z,13Z,16Z,19Z)) | 8.89 | 1050.5226 | M+H | C52H81N3O15P2 | 0.95 | 54.72 | 100 - 58.8 - 20.1 - 5.03 - 1.02 - 0.174 |
| Cervonoyl ethanolamide | 9.44 | 355.2645 | M+H-H2O, M+H | C24H36O3 | 3.54 | 94.57 | 100 - 26.5 - 3.98 - 0.437 |
| Eucaglobulin | 9.59 | 497.1644 | M-H | C23H30O12 | -4.14 | 95.06 | 100 - 25.7 - 5.63 - 0.881 - 0.12 |
| Austalide I | 9.68 | 485.2205 | M-H | C27H34O8 | 4.86 | 90.14 | 100 - 29.9 - 5.96 - 0.89 - 0.109 |
| 7-Sulfocholic acid | 9.97 | 487.2369 | M-H | C24H40O8S | -0.38 | 92.74 | 100 - 27.5 - 9.81 - 1.97 - 0.341 |
| Ceanothine C | 11.05 | 451.2694 | M-H2O-H | C26H38N4O4 | -4.36 | 88.93 | 100 - 30.2 - 5.22 - 0.66 |
| Miglustat | 11.82 | 437.2881 | 2M-H | C10H21NO4 | 2.92 | 89.27 | 100 - 11.6 - 1.43 - 0.114 |
| Lucidenic acid J | 13.09 | 471.2398 | M-H2O-H | C27H38O8 | 1.96 | 97.08 | 100 - 29.9 - 5.97 - 0.893 - 0.11 |
| 2-[4,6-Bis(2,4-dimethylphenyl)-1,3,5-triazin-2-yl]-5-(octyloxy)phenol | 14.68 | 1017.6046 | 2M-H | C33H39N3O2 | 3.38 | 75.77 | 100 - 37.3 - 7.18 - 0.948 |
| 3b,12a-Dihydroxy-5a-cholanoic acid | 14.83 | 391.2853 | M-H, 2M-H | C24H40O4 | -0.09 | 96.83 | 100 - 26.6 - 4.21 - 0.494 |
| 3a,7a,12b-Trihydroxy-5b-cholanoic acid | 14.89 | 389.2682 | M-H2O-H | C24H40O5 | -3.76 | 92.97 | 100 - 26.6 - 4.43 - 0.551 |
| Blumenol C glucoside | 15.15 | 353.1969 | M-H2O-H | C19H32O7 | -0.25 | 85.64 | 100 - 21.2 - 3.57 - 0.44 |
| LysoPA(22:5(7Z,10Z,13Z,16Z,19Z)/0:0) | 15.33 | 502.2934 | M+NH4 | C25H41O7P | 1.15 | 96.00 | 100 - 27.8 - 5.15 - 0.717 |
| LysoPE(0:0/18:2(9Z,12Z)) | 15.55 | 476.2787 | M-H, 2M-H | C23H44NO7P | 0.86 | 95.58 | 100 - 26 - 4.69 - 0.633 |
| N-(1-Deoxy-1-fructosyl)methionine | 15.56 | 621.1980 | 2M-H | C11H21NO7S | -3.90 | 81.21 | 100 - 13.6 - 6.81 - 0.805 - 0.142 |
| LysoPE(0:0/18:1(11Z)) | 16.41 | 460.2836 | M-H2O-H | C23H46NO7P | 0.48 | 96.12 | 100 - 26 - 4.69 - 0.634 |
| Debenzoylzucchini factor B | 16.65 | 540.3837 | M-H2O-H | C37H53NO3 | -1.85 | 89.08 | 100 - 41.1 - 8.85 - 1.32 - 0.153 |
| Almotriptan | 16.70 | 336.1746 | M+H | C17H25N3O2S | 1.68 | 89.02 | 100 - 20.6 - 6.96 - 1.11 - 0.138 |
| C.I. Food Black 1 | 16.98 | 1556.9907 | 2M-H | C28H21N5O14S4 | 2.82 | 73.82 | 100 - 36.1 - 27.3 - 8.14 - 3.2 - 0.795 - 0.215 |
| 13S-hydroxyoctadecadienoic acid | 16.99 | 295.2269 | M-H | C18H32O3 | -3.30 | 96.39 | 100 - 20 - 2.5 - 0.235 |
| Isorhamnetin 3-O-[b-D-glucopyranosyl-(1->2)-a-L-rhamnopyranoside] | 17.44 | 623.2145 | M-H2O-H, M-H | C28H32O16 | 4.58 | 90.51 | 100 - 31.3 - 8.01 - 1.49 - 0.238 |
| Dehydroisocoproporphyrinogen | 17.72 | 651.2447 | M-H | C36H36N4O8 | -1.98 | 90.97 | 100 - 41.1 - 9.88 - 1.75 - 0.249 |
| Neoacrimarine B | 17.73 | 666.2685 | M-H | C39H41NO9 | -3.49 | 95.27 | 100 - 43.4 - 11 - 2.06 - 0.311 |
| Kaempferol 3-gentiobioside 7-rhamnoside | 17.82 | 737.1918 | M-H2O-H | C33H40O20 | -2.16 | 74.15 | 100 - 36.9 - 10.7 - 2.28 - 0.417 |
| Hydrocortamate | 18.34 | 498.2816 | M+Na | C27H41NO6 | -2.02 | 94.23 | 100 - 30.3 - 5.66 - 0.788 |
| norcisapride | 19.77 | 625.2304 | 2M-H | C14H20ClN3O3 | -1.60 | 72.61 | 100 - 16.6 - 33.9 - 5.46 - 0.621 |
| Stearic acid | 19.77 | 283.2633 | M-H | C18H36O2 | -3.35 | 96.09 | 100 - 20 - 2.3 - 0.194 |
| xi-10-Hydroxyoctadecanoic acid | 19.97 | 299.2582 | M-H | C18H36O3 | -3.33 | 95.86 | 100 - 20 - 2.51 - 0.236 |
| LysoPC(17:0) | 20.06 | 508.3411 | M-H | C25H52NO7P | 0.40 | 94.73 | 100 - 28.3 - 5.29 - 0.742 |
| Ganglioside GA2 (d18:1/18:0) | 20.06 | 1091.7174 | M-H | C56H104N2O18 | -3.45 | 88.05 | 100 - 63.2 - 23.3 - 6.33 - 1.39 - 0.259 |
| S-(9-deoxy-delta9,12-PGD2)-glutathione | 20.07 | 640.2913 | M-H | C30H47N3O10S | 0.53 | 97.56 | 100 - 35.3 - 12.6 - 2.95 - 0.571 |
| PC(15:0/22:6(4Z,7Z,10Z,13Z,16Z,19Z)) | 20.88 | 774.5429 | M+H-H2O | C45H78NO8P | -0.37 | 83.32 | 100 - 50.2 - 14 - 2.81 - 0.448 |
| 1-Oleoylglycerophosphoserine | 20.94 | 522.2831 | M-H | C24H46NO9P | -1.29 | 92.23 | 100 - 27.2 - 5.41 - 0.8 |
| MG(0:0/20:4(8Z,11Z,14Z,17Z)/0:0) | 21.35 | 379.2855 | M+H-H2O, M+H | C23H38O4 | 3.60 | 96.46 | 100 - 25.5 - 3.93 - 0.451 |
| AS 1-5 | 21.50 | 698.5536 | M+H-H2O, M+H | C40H77NO9 | -4.06 | 73.13 | 100 - 44.9 - 11.7 - 2.23 - 0.343 |
| 1b-Hydroxycholic acid | 21.51 | 423.2734 | M-H | C24H40O6 | -4.22 | 94.83 | 100 - 26.6 - 4.64 - 0.607 |
| 17-HDoHE | 21.53 | 325.2157 | M-H2O-H | C22H32O3 | -4.58 | 98.48 | 100 - 24.3 - 3.43 - 0.358 |
| Palmitoyl glucuronide | 21.65 | 399.2739 | M-H2O-H | C22H42O7 | -3.24 | 94.20 | 100 - 24.5 - 4.32 - 0.568 |
| MG(0:0/18:2(9Z,12Z)/0:0) | 21.70 | 355.2859 | M+H | C21H38O4 | 4.46 | 95.15 | 100 - 23.3 - 3.41 - 0.374 |
| PS(22:2(13Z,16Z)/15:0) | 22.12 | 800.5429 | M-H | C43H80NO10P | -2.31 | 88.15 | 100 - 48.2 - 13.4 - 2.73 - 0.448 |
| Sirolimus | 22.13 | 894.5413 | M-H2O-H | C51H79NO13 | 4.43 | 71.73 | 100 - 56.9 - 18.6 - 4.43 - 0.848 - 0.137 |
| PS(DiMe(11,3)/DiMe(11,3)) | 22.18 | 848.5079 | M-H2O-H | C46H78NO12P | -0.54 | 83.75 | 100 - 51.5 - 15.4 - 3.4 - 0.605 |
| Nelfinavir | 22.18 | 548.2980 | M-H2O-H | C32H45N3O4S | 4.86 | 84.38 | 100 - 37.2 - 12.1 - 2.74 - 0.473 |
| Docosahexaenoic acid | 22.31 | 327.2327 | M-H, 2M-H, M-H2O-H | C22H32O2 | -0.77 | 95.41 | 100 - 24.2 - 3.22 - 0.307 |
| Cardanolmonoene | 22.31 | 283.2428 | M-H2O-H | C21H34O | -1.20 | 96.22 | 100 - 23.1 - 2.76 - 0.226 |
| 1,2-Di-(9Z,12Z-octadecadienoyl)-sn-glycero-3-phosphate | 22.33 | 677.4538 | M-H2O-H | C39H69O8P | -1.95 | 98.64 | 100 - 43.3 - 10.8 - 1.96 - 0.288 |
| (9S,10S)-10-hydroxy-9-(phosphonooxy)octadecanoate | 22.33 | 395.2202 | M-H | C18H37O7P | -0.61 | 99.05 | 100 - 20.2 - 3.37 - 0.406 |
| 24-Acetyl- 25-cinnamoylvulgaroside | 22.35 | 609.3418 | M+H | C36H48O8 | -0.68 | 89.12 | 100 - 39.8 - 9.35 - 1.62 - 0.227 |
| PC(16:0/20:4(5Z,8Z,11Z,14Z)) | 22.37 | 804.5502 | M+Na | C44H80NO8P | -1.50 | 78.57 | 100 - 49.2 - 13.5 - 2.67 - 0.42 |
| LysoPC(22:0) | 22.37 | 602.4173 | M+Na | C30H62NO7P | 2.89 | 91.15 | 100 - 33.8 - 6.97 - 1.07 - 0.133 |
| PG(a-13:0/i-20:0) | 22.38 | 754.5586 | M+NH4 | C39H77O10P | -0.87 | 85.88 | 100 - 43.4 - 11.3 - 2.16 - 0.336 |
| Liquoric acid | 22.55 | 967.6263 | 2M-H | C30H44O5 | -4.27 | 52.21 | 100 - 33.1 - 6.34 - 0.89 |
| PA(16:0/16:0) | 22.55 | 629.4539 | M-H2O-H | C35H69O8P | -1.93 | 96.87 | 100 - 39 - 9.03 - 1.55 - 0.214 |
| MG(0:0/16:0/0:0) | 22.58 | 313.2753 | M+H-H2O, M+H, M+Na | C19H38O4 | 4.69 | 97.53 | 100 - 21.1 - 2.95 - 0.308 |
| PC(14:0/22:4(7Z,10Z,13Z,16Z)) | 22.59 | 804.5488 | M+Na | C44H80NO8P | -3.24 | 86.89 | 100 - 49.2 - 13.5 - 2.67 - 0.42 |
| PC(16:0/18:2(9Z,12Z)) | 22.59 | 780.5510 | M+Na | C42H80NO8P | -0.47 | 86.62 | 100 - 47 - 12.5 - 2.39 - 0.367 |
| PE(15:0/20:0) | 22.59 | 756.5504 | M+Na | C40H80NO8P | -1.37 | 88.58 | 100 - 44.9 - 11.5 - 2.14 - 0.319 |
| PGP(18:0/22:4(7Z,10Z,13Z,16Z)) | 22.65 | 905.5340 | M-H | C46H84O13P2 | 2.78 | 72.79 | 100 - 51.2 - 15.5 - 3.47 - 0.628 |
| Gluten exorphin C | 22.68 | 666.3927 | M-H | C29H57N5O12 | -0.54 | 79.78 | 100 - 34.3 - 8.18 - 1.46 - 0.216 |
| PC(16:0/24:1(15Z)) | 22.75 | 844.6792 | M+H | C48H94NO8P | 0.26 | 82.90 | 100 - 53.7 - 15.8 - 3.31 - 0.55 |
| PE(18:0/22:5(4Z,7Z,10Z,13Z,16Z)) | 22.75 | 776.5557 | M+H-H2O, M+Na, M+H | C45H80NO8P | -3.95 | 60.40 | 100 - 50.3 - 14 - 2.81 - 0.449 |
| SM(d18:0/16:1(9Z)) | 22.75 | 703.5736 | M+H | C39H79N2O6P | -1.77 | 96.57 | 100 - 44 - 10.7 - 1.87 - 0.258 |
| DG(14:0/20:2(11Z,14Z)/0:0) | 22.75 | 575.5012 | M+H-H2O | C37H68O5 | -3.73 | 27.57 | 100 - 41 - 9.21 - 1.48 - 0.188 |
| N-Palmitoylsphingosine | 22.75 | 538.5189 | M+H | C34H67NO3 | -0.94 | 89.59 | 100 - 38 - 7.65 - 1.08 - 0.118 |
| Norfloxacin | 22.75 | 337.1681 | M+NH4 | C16H18FN3O3 | 3.22 | 96.10 | 100 - 18.7 - 2.27 - 0.207 |
| PC(18:0/22:6(4Z,7Z,10Z,13Z,16Z,19Z)) | 22.77 | 856.5793 | M+Na | C48H84NO8P | -4.07 | 65.04 | 100 - 53.6 - 15.7 - 3.29 - 0.546 |
| PC(15:0/20:5(5Z,8Z,11Z,14Z,17Z)) | 22.77 | 748.5255 | M+H-H2O, M+H | C43H76NO8P | -2.64 | 89.21 | 100 - 48.1 - 12.9 - 2.52 - 0.391 |
| PC(16:0/16:0) | 22.77 | 756.5508 | M+Na | C40H80NO8P | -0.75 | 89.45 | 100 - 44.9 - 11.5 - 2.14 - 0.319 |
| DG(22:5(4Z,7Z,10Z,13Z,16Z)/22:6(4Z,7Z,10Z,13Z,16Z,19Z)/0:0) | 22.77 | 732.5575 | M+NH4 | C47H70O5 | 1.86 | 82.72 | 100 - 51.8 - 14.2 - 2.71 - 0.404 |
| DG(18:2n6/0:0/22:2n6) | 22.77 | 725.5489 | M+K | C44H78O5 | 1.22 | 76.42 | 100 - 48.7 - 12.6 - 2.3 - 0.328 |
| DG(16:0/22:4(7Z,10Z,13Z,16Z)/0:0) | 22.77 | 627.5343 | M+H-H2O | C41H72O5 | -0.58 | 78.71 | 100 - 45.4 - 11.1 - 1.91 - 0.26 |
| LysoPC(24:1(15Z)) | 22.77 | 606.4483 | M+H | C32H64NO7P | -1.63 | 73.15 | 100 - 36 - 7.72 - 1.23 - 0.157 |
| LysoPC(20:0/0:0) | 22.79 | 574.3842 | M+Na | C28H58NO7P | -0.19 | 96.96 | 100 - 31.6 - 6.26 - 0.928 - 0.112 |
| 5-(3',4'-dihydroxyphenyl)-gamma-valerolactone-3'-O-glucuronide | 22.79 | 421.1104 | M+Na | C18H22O10 | -0.35 | 90.02 | 100 - 20.1 - 3.97 - 0.527 |
| Docosapentaenoic acid (22n-6) | 22.83 | 329.2483 | M-H | C22H34O2 | -1.00 | 96.43 | 100 - 24.3 - 3.23 - 0.307 |
| MG(0:0/18:1(11Z)/0:0) | 22.98 | 357.3014 | M+H-H2O, M+H | C21H40O4 | 4.30 | 96.01 | 100 - 23.3 - 3.42 - 0.375 |
| PC-M6 | 23.17 | 841.5192 | 2M-H | C27H35NO3 | 3.70 | 31.54 | 100 - 30.1 - 4.98 - 0.592 |
| Lathosterol | 23.17 | 369.3527 | M+H-H2O | C27H46O | 2.86 | 96.97 | 100 - 29.8 - 4.48 - 0.455 |
| PE(18:0/18:3(6Z,9Z,12Z)) | 23.19 | 724.5247 | M+H-H2O | C41H76NO8P | -3.81 | 44.49 | 100 - 45.9 - 11.9 - 2.26 - 0.341 |
| PS(18:0/22:6(4Z,7Z,10Z,13Z,16Z,19Z)) | 23.20 | 834.5299 | M-H | C46H78NO10P | 1.00 | 89.22 | 100 - 51.4 - 15 - 3.18 - 0.541 |
| N-Heptanoylglycine | 23.23 | 373.2351 | 2M-H | C9H17NO3 | 1.71 | 90.43 | 100 - 10.4 - 1.1 |
| 8,11,14-Eicosatrienoic acid | 23.23 | 305.2482 | M-H, 2M-H | C20H34O2 | -1.22 | 96.73 | 100 - 22.1 - 2.74 - 0.246 |
| PC(18:4(6Z,9Z,12Z,15Z)/22:2(13Z,16Z)) | 23.25 | 856.5807 | M+Na | C48H84NO8P | -2.35 | 46.03 | 100 - 53.6 - 15.7 - 3.29 - 0.546 |
| PC(16:0/22:4(7Z,10Z,13Z,16Z)) | 23.25 | 832.5794 | M+Na, M+K | C46H84NO8P | -4.08 | 45.69 | 100 - 51.4 - 14.6 - 2.97 - 0.48 |
| Lactosylceramide (d18:1/12:0) | 23.27 | 806.5652 | M+H, M+Na | C42H79NO13 | 3.40 | 87.91 | 100 - 47.2 - 13.6 - 2.9 - 0.504 |
| PC(14:0/22:5(4Z,7Z,10Z,13Z,16Z)) | 23.27 | 780.5515 | M+H, M+Na | C44H78NO8P | -2.94 | 87.61 | 100 - 49.2 - 13.5 - 2.66 - 0.419 |
| PC(14:0/20:3(5Z,8Z,11Z)) | 23.27 | 756.5515 | M+H | C42H78NO8P | -3.08 | 88.35 | 100 - 47 - 12.4 - 2.39 - 0.366 |
| PE-NMe(14:1(9Z)/16:1(9Z)) | 23.29 | 672.4602 | M-H | C36H68NO8P | -1.09 | 84.03 | 100 - 40.4 - 9.59 - 1.68 - 0.237 |
| Tetracosahexaenoic acid | 23.36 | 355.2639 | M-H | C24H36O2 | -0.98 | 95.43 | 100 - 26.4 - 3.77 - 0.381 |
| 1-Stearoylglycerophosphoinositol | 23.42 | 599.3188 | M-H | C27H53O12P | -2.37 | 95.59 | 100 - 30.3 - 6.89 - 1.16 - 0.165 |
| Antibiotic X 14889C | 23.72 | 613.3961 | M-H | C33H58O10 | 0.61 | 73.18 | 100 - 36.7 - 8.61 - 1.51 - 0.217 |
| Cyclonormammein | 23.72 | 355.1567 | M-H2O-H | C21H26O6 | 4.22 | 88.24 | 100 - 23.2 - 3.81 - 0.468 |
| Palmitic acid | 23.74 | 255.2320 | M-H | C16H32O2 | -3.77 | 96.04 | 100 - 17.7 - 1.89 - 0.15 |
| Grewinol | 23.75 | 526.5534 | M+NH4 | C34H68O2 | -4.71 | 72.71 | 100 - 37.6 - 7.29 - 0.969 |
| CDP-DG(i-20:0/18:2(9Z,11Z)) | 23.75 | 1051.6149 | M+NH4 | C50H89N3O15P2 | 4.02 | 90.19 | 100 - 56.8 - 18.9 - 4.63 - 0.918 - 0.155 |
| 1-Stearoylglycerophosphoserine | 23.77 | 526.3152 | M+H, M+Na, M+H-H2O | C24H48NO9P | 2.40 | 95.59 | 100 - 27.2 - 5.41 - 0.801 |
| MG(18:0/0:0/0:0) | 23.78 | 341.3062 | M+H-H2O | C21H42O4 | 3.16 | 95.07 | 100 - 23.3 - 3.42 - 0.376 |
| PS(14:1(9Z)/14:1(9Z)) | 23.80 | 656.3931 | M-H2O-H | C34H62NO10P | -0.32 | 98.23 | 100 - 38.2 - 9.16 - 1.64 - 0.24 |
| (E)-Squamosamide | 23.93 | 446.1593 | M-H2O-H | C26H27NO7 | -3.37 | 91.25 | 100 - 29.1 - 5.51 - 0.783 |
| Kinetensin 1-3 | 24.37 | 397.1944 | M+K | C15H30N6O4 | -4.37 | 94.32 | 100 - 18.9 - 2.52 - 0.251 |
| 3-Hydroxy-6,8-dimethoxy-7(11)-eremophilen-12,8-olide | 25.05 | 309.1711 | M-H | C17H26O5 | 1.12 | 90.28 | 100 - 18.9 - 2.71 - 0.288 |

**Table S5.** Identification results of the main altered metabolites in proximal colon between UC group and SYD group

| Compound | RT (min) | m/z | Adducts | Formula | Mass Error (ppm) | Isotope Similarity | Theoretical Isotope Distribution |
| --- | --- | --- | --- | --- | --- | --- | --- |
| Oxidized glutathione | 0.73 | 611.1427 | M-H | C20H32N6O12S2 | -3.23 | 97.08 | 100 - 26.2 - 14.8 - 3.22 - 0.876 - 0.154 |
| Ascorbic acid | 0.80 | 175.0240 | M-H | C6H8O6 | -4.78 | 97.29 | 100 - 6.81 - 1.43 |
| PG(a-13:0/i-15:0) | 5.09 | 705.4088 | M+K | C34H67O10P | -2.31 | 67.23 | 100 - 37.9 - 9.05 - 1.61 - 0.235 |
| 7-Hydroxydehydroglaucine | 5.61 | 352.1548 | M+H-H2O | C21H23NO5 | 1.34 | 95.60 | 100 - 23.5 - 3.67 - 0.43 |
| Alpha-Linolenoyl-CoA | 8.81 | 1050.3163 | M+Na | C39H64N7O17P3S | -2.04 | 58.11 | 100 - 46.9 - 18.8 - 5.33 - 1.26 - 0.25 |
| Cyclolinopeptide G | 8.84 | 1120.4943 | M+Na | C56H75N9O10S2 | -2.55 | 46.23 | 100 - 66.7 - 33 - 12 - 3.58 - 0.898 - 0.194 |
| 9,10,13-TriHOME | 8.87 | 329.2318 | M-H | C18H34O5 | -4.77 | 95.11 | 100 - 20 - 2.93 - 0.32 |
| Aurasperone B | 10.18 | 587.1575 | M-H2O-H | C32H30O12 | 2.72 | 67.23 | 100 - 35.4 - 8.55 - 1.55 - 0.232 |
| CGP71422 | 10.18 | 490.2376 | M-H2O-H | C29H31N7O2 | 3.01 | 84.23 | 100 - 34.4 - 6.14 - 0.758 |
| Ceanothine C | 11.05 | 451.2694 | M-H2O-H | C26H38N4O4 | -4.36 | 88.93 | 100 - 30.2 - 5.22 - 0.66 |
| 12-(3,4-dihydroxyphenyl)-13-hydroxy-6-(4-hydroxy-3-methoxyphenyl)-8-{[3,4,5-trihydroxy-6-(hydroxymethyl)oxan-2-yl]oxy}-3,11-dioxatricyclo | 11.07 | 629.1837 | M+H | C31H32O14 | -4.38 | 86.72 | 100 - 34.4 - 8.62 - 1.61 - 0.252 |
| Elenolide | 13.49 | 447.1319 | 2M-H | C11H12O5 | 4.90 | 93.15 | 100 - 12.2 - 1.71 - 0.148 |
| 3-O-Acetylepisamarcandin | 13.49 | 460.2683 | M+NH4 | C26H34O6 | -2.34 | 96.24 | 100 - 28.7 - 5.21 - 0.707 |
| Dictyoquinazol C | 14.68 | 683.2345 | 2M-H | C18H18N2O5 | -2.07 | 90.50 | 100 - 20.6 - 3.04 - 0.336 |
| 2-[4,6-Bis(2,4-dimethylphenyl)-1,3,5-triazin-2-yl]-5-(octyloxy)phenol | 14.68 | 1017.6046 | 2M-H | C33H39N3O2 | 3.38 | 75.77 | 100 - 37.3 - 7.18 - 0.948 |
| 2-(1-{[(1-{3-[(E)-2-(7-chloroquinolin-2-yl)ethenyl]phenyl}-3-hydroxy-3-[2-(2-hydroxypropan-2-yl)phenyl]propyl)sulfanyl]methyl}cyclopropyl)acetic acid | 15.61 | 582.1883 | M-H2O-H | C35H36ClNO4S | 1.33 | 71.30 | 100 - 39.6 - 44.9 - 15.7 - 4.69 - 1.05 - 0.182 |
| 6-{[2-(2,4-dihydroxyphenyl)-3-(3,7-dimethylocta-2,6-dien-1-yl)-7-hydroxy-4-oxo-4H-chromen-6-yl]oxy}-3,4,5-trihydroxyoxane-2-carboxylic acid | 16.52 | 597.1994 | M-H | C31H34O12 | 2.69 | 90.89 | 100 - 34.4 - 8.19 - 1.46 - 0.217 |
| LysoPE(0:0/16:0) | 16.52 | 452.2787 | M-H, 2M-H | C21H44NO7P | 1.05 | 97.84 | 100 - 23.9 - 4.16 - 0.54 |
| CL(16:1(9Z)/16:1(9Z)/22:6(4Z,7Z,10Z,13Z,16Z,19Z)/22:6(4Z,7Z,10Z,13Z,16Z,19Z)) | 16.72 | 1473.9184 | M-H2O-H | C85H138O17P2 | -3.13 | 63.81 | 100 - 94.2 - 47.3 - 16.7 - 4.65 - 1.07 - 0.214 |
| PS(18:0/18:0) | 16.93 | 790.5573 | M-H | C42H82NO10P | -3.88 | 87.66 | 100 - 47.1 - 12.9 - 2.6 - 0.421 |
| 13S-hydroxyoctadecadienoic acid | 16.99 | 295.2269 | M-H | C18H32O3 | -3.30 | 96.39 | 100 - 20 - 2.5 - 0.235 |
| Forasartan | 17.36 | 397.2250 | M-H2O-H | C23H28N8 | -2.11 | 74.97 | 100 - 28.1 - 3.81 - 0.332 |
| Isorhamnetin 3-O-[b-D-glucopyranosyl-(1->2)-a-L-rhamnopyranoside] | 17.44 | 623.2145 | M-H2O-H, M-H | C28H32O16 | 4.58 | 90.51 | 100 - 31.3 - 8.01 - 1.49 - 0.238 |
| LysoPE(0:0/22:4(7Z,10Z,13Z,16Z)) | 17.56 | 1057.5390 | M-H, 2M-H | C27H48NO7P | 1.67 | 85.72 | 100 - 30.4 - 5.9 - 0.857 - 0.101 |
| Dehydroisocoproporphyrinogen | 17.72 | 651.2447 | M-H | C36H36N4O8 | -1.98 | 90.97 | 100 - 41.1 - 9.88 - 1.75 - 0.249 |
| Hordatine B | 17.72 | 1159.6123 | 2M-H | C29H40N8O5 | -4.13 | 70.58 | 100 - 34.9 - 6.96 - 1.01 - 0.117 |
| Neoacrimarine B | 17.73 | 666.2685 | M-H | C39H41NO9 | -3.49 | 95.27 | 100 - 43.4 - 11 - 2.06 - 0.311 |
| Kaempferol 3-gentiobioside 7-rhamnoside | 17.82 | 737.1918 | M-H2O-H | C33H40O20 | -2.16 | 74.15 | 100 - 36.9 - 10.7 - 2.28 - 0.417 |
| Niazicinin A | 18.70 | 737.2807 | 2M-H | C17H23NO8 | 4.40 | 87.59 | 100 - 19.3 - 3.41 - 0.419 |
| norcisapride | 19.77 | 625.2304 | 2M-H | C14H20ClN3O3 | -1.60 | 72.61 | 100 - 16.6 - 33.9 - 5.46 - 0.621 |
| delta5-Demissine | 19.77 | 1014.5293 | M-H | C50H81NO20 | 1.39 | 92.70 | 100 - 56.1 - 19.6 - 5.09 - 1.08 - 0.198 |
| S-(9-deoxy-delta9,12-PGD2)-glutathione | 20.07 | 640.2913 | M-H | C30H47N3O10S | 0.53 | 97.56 | 100 - 35.3 - 12.6 - 2.95 - 0.571 |
| 3-Hexaprenyl-4-hydroxybenzoic acid | 20.07 | 1091.8038 | 2M-H | C37H54O3 | -3.24 | 86.49 | 100 - 40.8 - 8.7 - 1.29 - 0.149 |
| PC(14:0/22:0) | 20.08 | 812.6144 | M+Na | C44H88NO8P | 0.57 | 81.68 | 100 - 49.3 - 13.5 - 2.68 - 0.422 |
| PE(22:6(4Z,7Z,10Z,13Z,16Z,19Z)/18:1(11Z)) | 20.11 | 788.5245 | M-H | C45H76NO8P | 1.22 | 85.67 | 100 - 50.2 - 14 - 2.8 - 0.447 |
| 11-Hydroxyprogesterone 11-glucuronide | 20.38 | 524.2869 | M+NH4 | C27H38O9 | 2.87 | 91.86 | 100 - 30 - 6.19 - 0.957 - 0.122 |
| CL(8:0/8:0/8:0/20:0) | 20.66 | 1071.6540 | M-H | C53H102O17P2 | 1.90 | 87.13 | 100 - 59.1 - 20.7 - 5.33 - 1.11 - 0.198 |
| LysoPE(0:0/22:2(13Z,16Z)) | 21.08 | 532.3391 | M-H | C27H52NO7P | -3.39 | 94.70 | 100 - 30.4 - 5.91 - 0.86 - 0.102 |
| MG(0:0/18:2(9Z,12Z)/0:0) | 21.70 | 355.2859 | M+H | C21H38O4 | 4.46 | 95.15 | 100 - 23.3 - 3.41 - 0.374 |
| Nelfinavir | 22.18 | 548.2980 | M-H2O-H | C32H45N3O4S | 4.86 | 84.38 | 100 - 37.2 - 12.1 - 2.74 - 0.473 |
| 16-Hydroxy hexadecanoic acid | 22.19 | 253.2164 | M-H2O-H | C16H32O3 | -3.37 | 96.96 | 100 - 17.8 - 2.1 - 0.187 |
| (9S,10S)-10-hydroxy-9-(phosphonooxy)octadecanoate | 22.33 | 395.2202 | M-H | C18H37O7P | -0.61 | 99.05 | 100 - 20.2 - 3.37 - 0.406 |
| CL(8:0/8:0/8:0/19:0) | 22.33 | 1039.6248 | M-H2O-H | C52H100O17P2 | -0.87 | 64.31 | 100 - 58 - 20 - 5.11 - 1.06 - 0.186 |
| 24-Acetyl- 25-cinnamoylvulgaroside | 22.35 | 609.3418 | M+H | C36H48O8 | -0.68 | 89.12 | 100 - 39.8 - 9.35 - 1.62 - 0.227 |
| PG(a-13:0/i-20:0) | 22.38 | 754.5586 | M+NH4 | C39H77O10P | -0.87 | 85.88 | 100 - 43.4 - 11.3 - 2.16 - 0.336 |
| Liquoric acid | 22.55 | 967.6263 | 2M-H | C30H44O5 | -4.27 | 52.21 | 100 - 33.1 - 6.34 - 0.89 |
| PC(16:0/18:2(9Z,12Z)) | 22.59 | 780.5510 | M+Na | C42H80NO8P | -0.47 | 86.62 | 100 - 47 - 12.5 - 2.39 - 0.367 |
| PGP(18:0/22:4(7Z,10Z,13Z,16Z)) | 22.65 | 905.5340 | M-H | C46H84O13P2 | 2.78 | 72.79 | 100 - 51.2 - 15.5 - 3.47 - 0.628 |
| Gluten exorphin C | 22.68 | 666.3927 | M-H | C29H57N5O12 | -0.54 | 79.78 | 100 - 34.3 - 8.18 - 1.46 - 0.216 |
| Oxmetidine | 22.71 | 398.1305 | M-H | C19H21N5O3S | 3.19 | 74.01 | 100 - 23.5 - 7.79 - 1.36 - 0.188 |
| PE(18:0/22:5(4Z,7Z,10Z,13Z,16Z)) | 22.75 | 776.5557 | M+H-H2O, M+Na, M+H | C45H80NO8P | -3.95 | 60.40 | 100 - 50.3 - 14 - 2.81 - 0.449 |
| DG(16:0e/18:0/0:0) | 22.75 | 605.5488 | M+Na | C37H74O4 | 1.50 | 67.69 | 100 - 41 - 9.02 - 1.4 - 0.17 |
| DG(14:0/20:2(11Z,14Z)/0:0) | 22.75 | 575.5012 | M+H-H2O | C37H68O5 | -3.73 | 27.57 | 100 - 41 - 9.21 - 1.48 - 0.188 |
| PC(18:0/22:6(4Z,7Z,10Z,13Z,16Z,19Z)) | 22.77 | 856.5793 | M+Na | C48H84NO8P | -4.07 | 65.04 | 100 - 53.6 - 15.7 - 3.29 - 0.546 |
| PC(20:3(5Z,8Z,11Z)/P-18:0) | 22.77 | 813.6447 | M+NH4 | C46H86NO7P | -4.19 | 80.43 | 100 - 51.4 - 14.4 - 2.86 - 0.45 |
| Diethylhexyl adipate | 22.77 | 409.2714 | M+K | C22H42O4 | -0.23 | 90.09 | 100 - 24.4 - 3.68 - 0.413 |
| 2-amino-4-({1-[(carboxymethyl)-C-hydroxycarbonimidoyl]-2-{[2-hydroxy-1-(4-methoxyphenyl)-3-oxopentyl]sulfanyl}ethyl}-C-hydroxycarbonimidoyl)butanoic acid | 23.14 | 536.1649 | M+Na | C22H31N3O9S | -4.73 | 74.09 | 100 - 26.4 - 9.72 - 1.92 - 0.34 |
| PS(18:0/22:6(4Z,7Z,10Z,13Z,16Z,19Z)) | 23.20 | 834.5299 | M-H | C46H78NO10P | 1.00 | 89.22 | 100 - 51.4 - 15 - 3.18 - 0.541 |
| DG(14:1(9Z)/22:2(13Z,16Z)/0:0) | 23.23 | 599.5069 | M-H2O-H | C39H70O5 | 3.95 | 89.21 | 100 - 43.2 - 10.1 - 1.69 - 0.222 |
| PC(18:4(6Z,9Z,12Z,15Z)/22:2(13Z,16Z)) | 23.25 | 856.5807 | M+Na | C48H84NO8P | -2.35 | 46.03 | 100 - 53.6 - 15.7 - 3.29 - 0.546 |
| PC(16:0/22:4(7Z,10Z,13Z,16Z)) | 23.25 | 832.5794 | M+Na, M+K | C46H84NO8P | -4.08 | 45.69 | 100 - 51.4 - 14.6 - 2.97 - 0.48 |
| PC(14:0/22:5(4Z,7Z,10Z,13Z,16Z)) | 23.27 | 780.5515 | M+H, M+Na | C44H78NO8P | -2.94 | 87.61 | 100 - 49.2 - 13.5 - 2.66 - 0.419 |
| Tetracosahexaenoic acid | 23.36 | 355.2639 | M-H | C24H36O2 | -0.98 | 95.43 | 100 - 26.4 - 3.77 - 0.381 |
| 1-Stearoylglycerophosphoinositol | 23.42 | 599.3188 | M-H | C27H53O12P | -2.37 | 95.59 | 100 - 30.3 - 6.89 - 1.16 - 0.165 |
| Haloperidol | 23.72 | 374.1318 | M-H | C21H23ClFNO2 | -2.69 | 85.36 | 100 - 23.4 - 35 - 7.77 - 0.989 |
| Cyclonormammein | 23.72 | 355.1567 | M-H2O-H | C21H26O6 | 4.22 | 88.24 | 100 - 23.2 - 3.81 - 0.468 |
| LysoPA(0:0/18:0) | 23.74 | 437.2666 | M-H | C21H43O7P | -1.72 | 94.70 | 100 - 23.5 - 4.07 - 0.525 |
| Palmitic acid | 23.74 | 255.2320 | M-H | C16H32O2 | -3.77 | 96.04 | 100 - 17.7 - 1.89 - 0.15 |
| Grewinol | 23.75 | 526.5534 | M+NH4 | C34H68O2 | -4.71 | 72.71 | 100 - 37.6 - 7.29 - 0.969 |
| CDP-DG(i-20:0/18:2(9Z,11Z)) | 23.75 | 1051.6149 | M+NH4 | C50H89N3O15P2 | 4.02 | 90.19 | 100 - 56.8 - 18.9 - 4.63 - 0.918 - 0.155 |
| 1-Stearoylglycerophosphoserine | 23.77 | 526.3152 | M+H, M+Na, M+H-H2O | C24H48NO9P | 2.40 | 95.59 | 100 - 27.2 - 5.41 - 0.801 |
| Pregnanetriol | 23.78 | 354.3003 | M+NH4 | C21H36O3 | 0.03 | 98.05 | 100 - 23.2 - 3.19 - 0.325 |
| MG(18:0/0:0/0:0) | 23.78 | 341.3062 | M+H-H2O | C21H42O4 | 3.16 | 95.07 | 100 - 23.3 - 3.42 - 0.376 |
| 9'-Carboxy-gamma-tocotrienol | 23.87 | 395.2193 | M+Na | C23H32O4 | -0.03 | 95.92 | 100 - 25.4 - 3.91 - 0.448 |
| (2-{[3-(3,4-dihydroxyphenyl)prop-2-enoyl]oxy}ethyl)trimethylazanium | 24.73 | 531.2718 | 2M-H | C14H20NO4+ | 1.14 | 93.29 | 100 - 15.9 - 2 - 0.185 |
